# Supplementary material for: Patient-derived three-dimensional cortical neurospheres to model Parkinson’s disease
Source: PubMed Central journal article supplement (PMC9714816; doi:10.1371/journal.pone.0277532), 2022-12-01

**Figure 4A:** pS129  $\alpha$ -Syn Panels  
 A53T – Disease NSC  
 Corr – Isogenic Control NSC  
 Imaged with LiCor Odyssey Dlx System

Ladder X X Corr X A53T X Ladder

70 KD  
 38 KD  
 25 KD

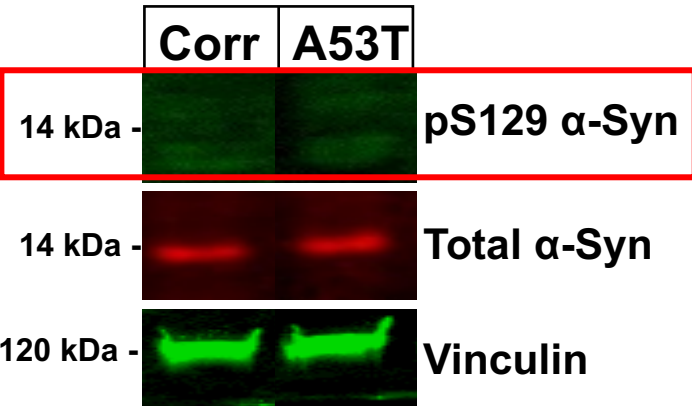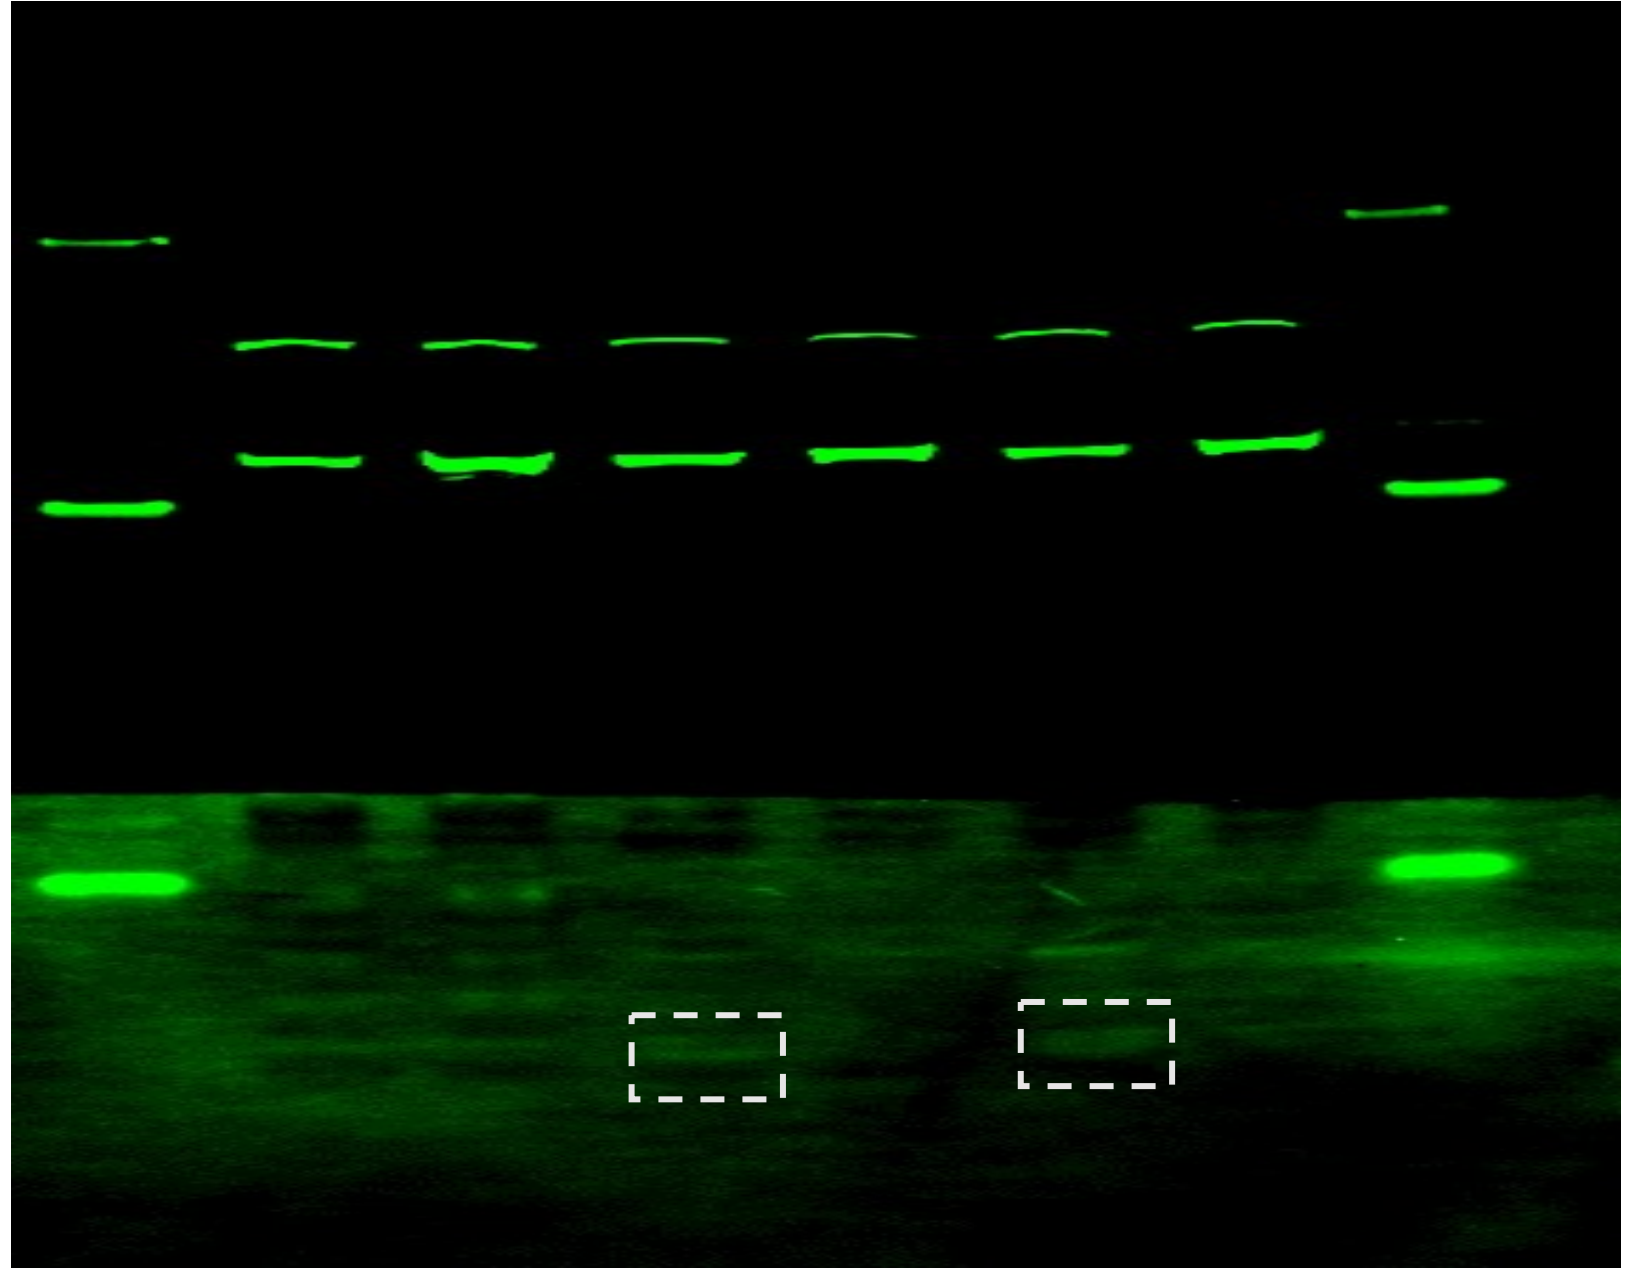

Blot was cut, both pieces included

**Figure 4A: Total  $\alpha$ -Syn Panels**  
 A53T – Disease NSC  
 Corr – Isogenic Control NSC  
 Imaged with LiCor Odyssey Dlx System

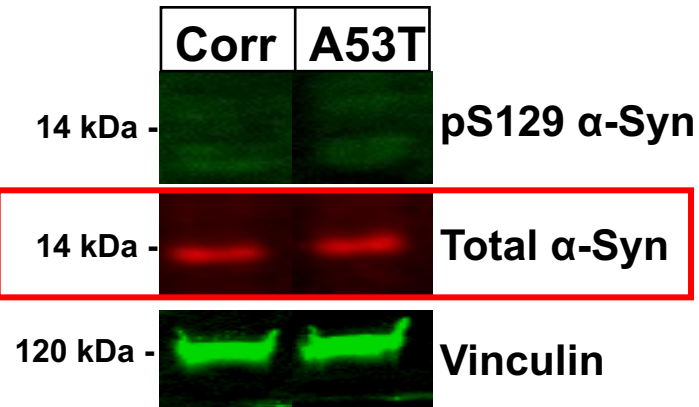

Blot was cut, both pieces included

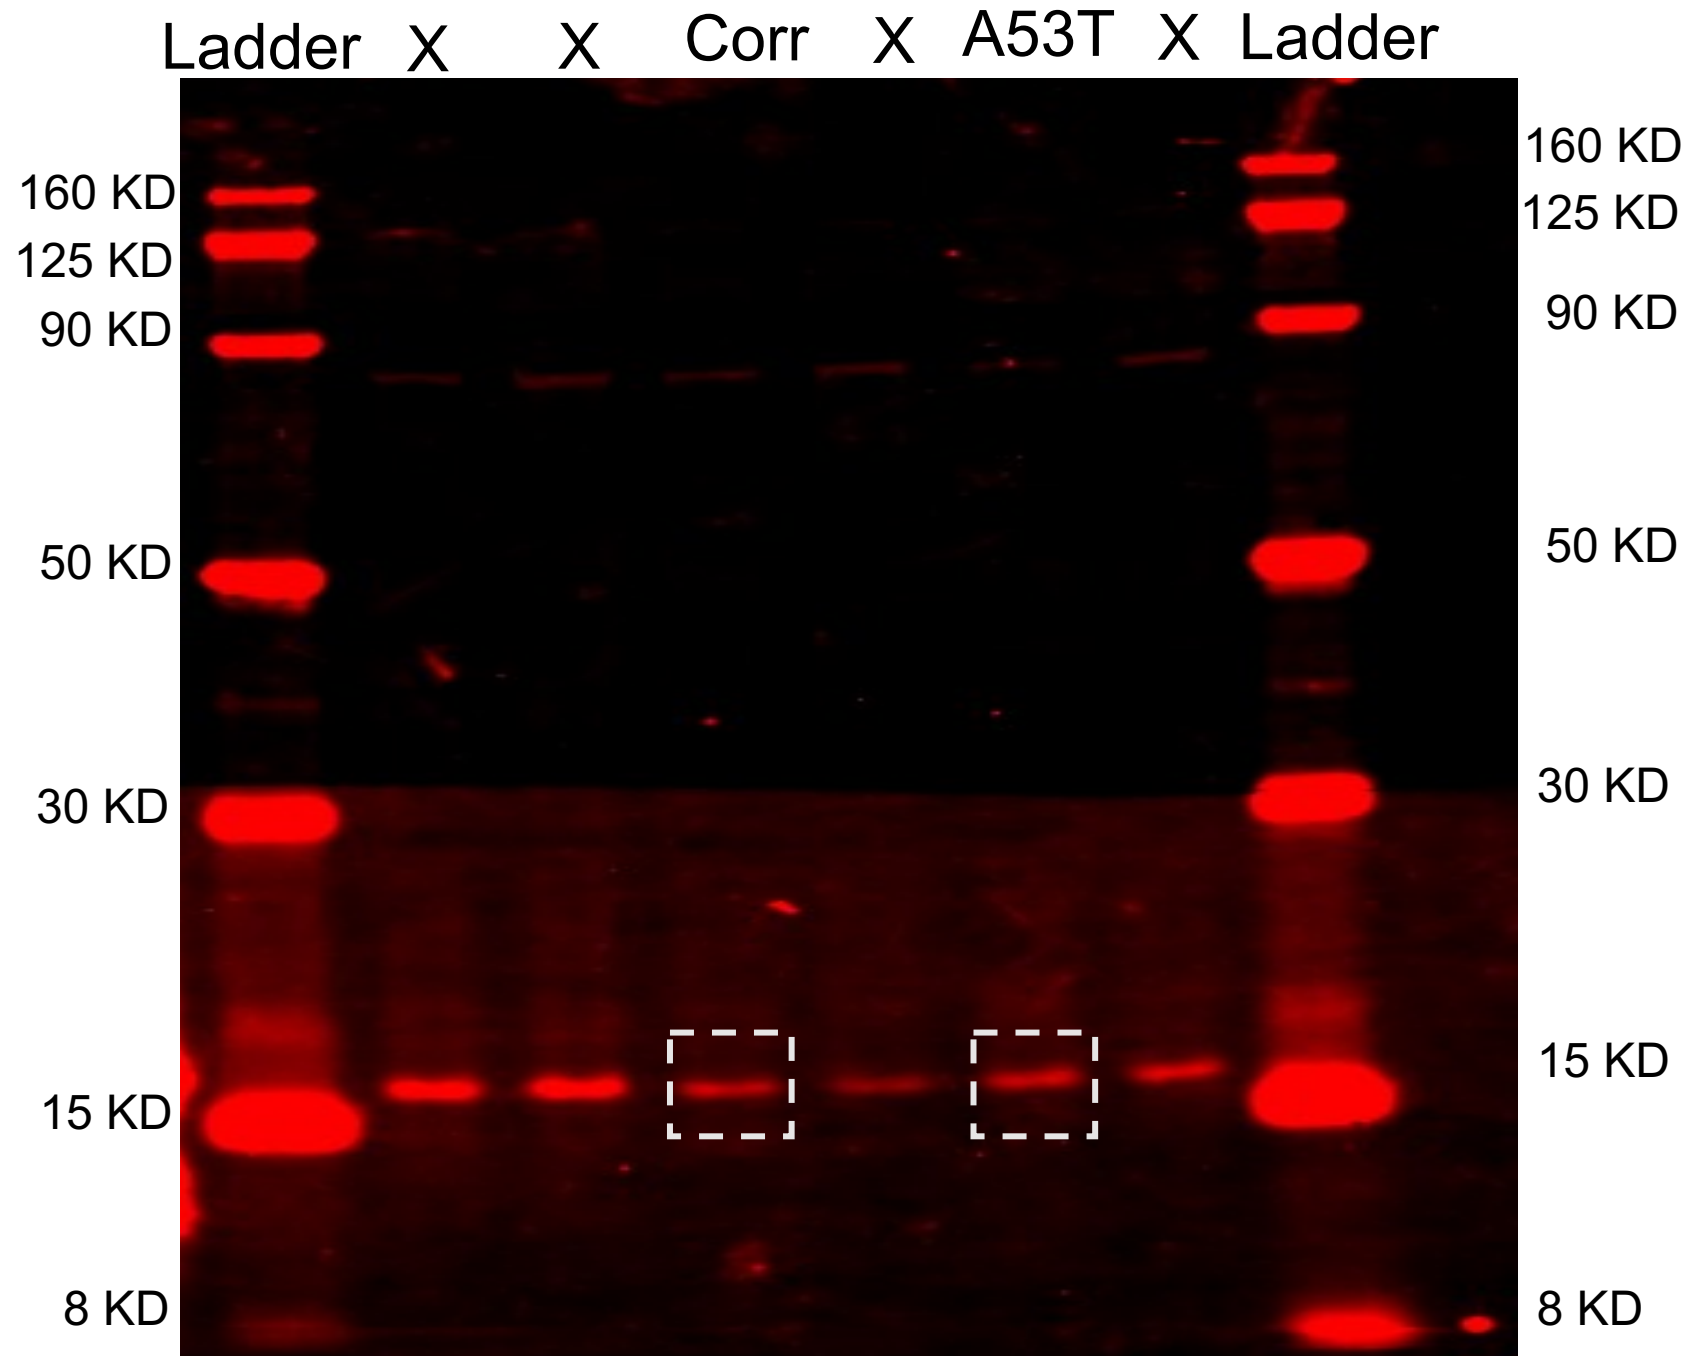

**Figure 4A:** Vinculin Panels  
 A53T – Disease NSC  
 Corr – Isogenic Control NSC  
 Imaged with LiCor Odyssey  
 Dlx System

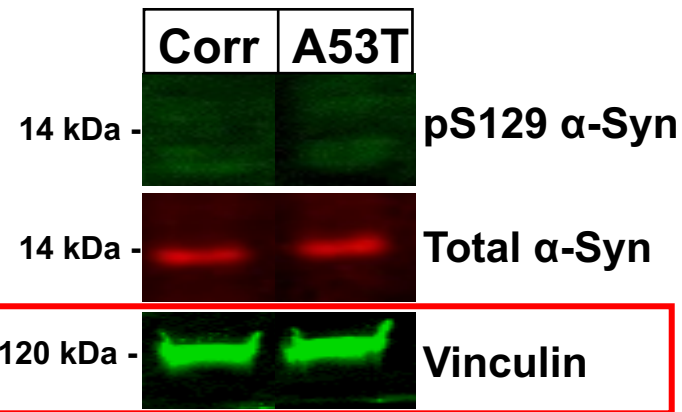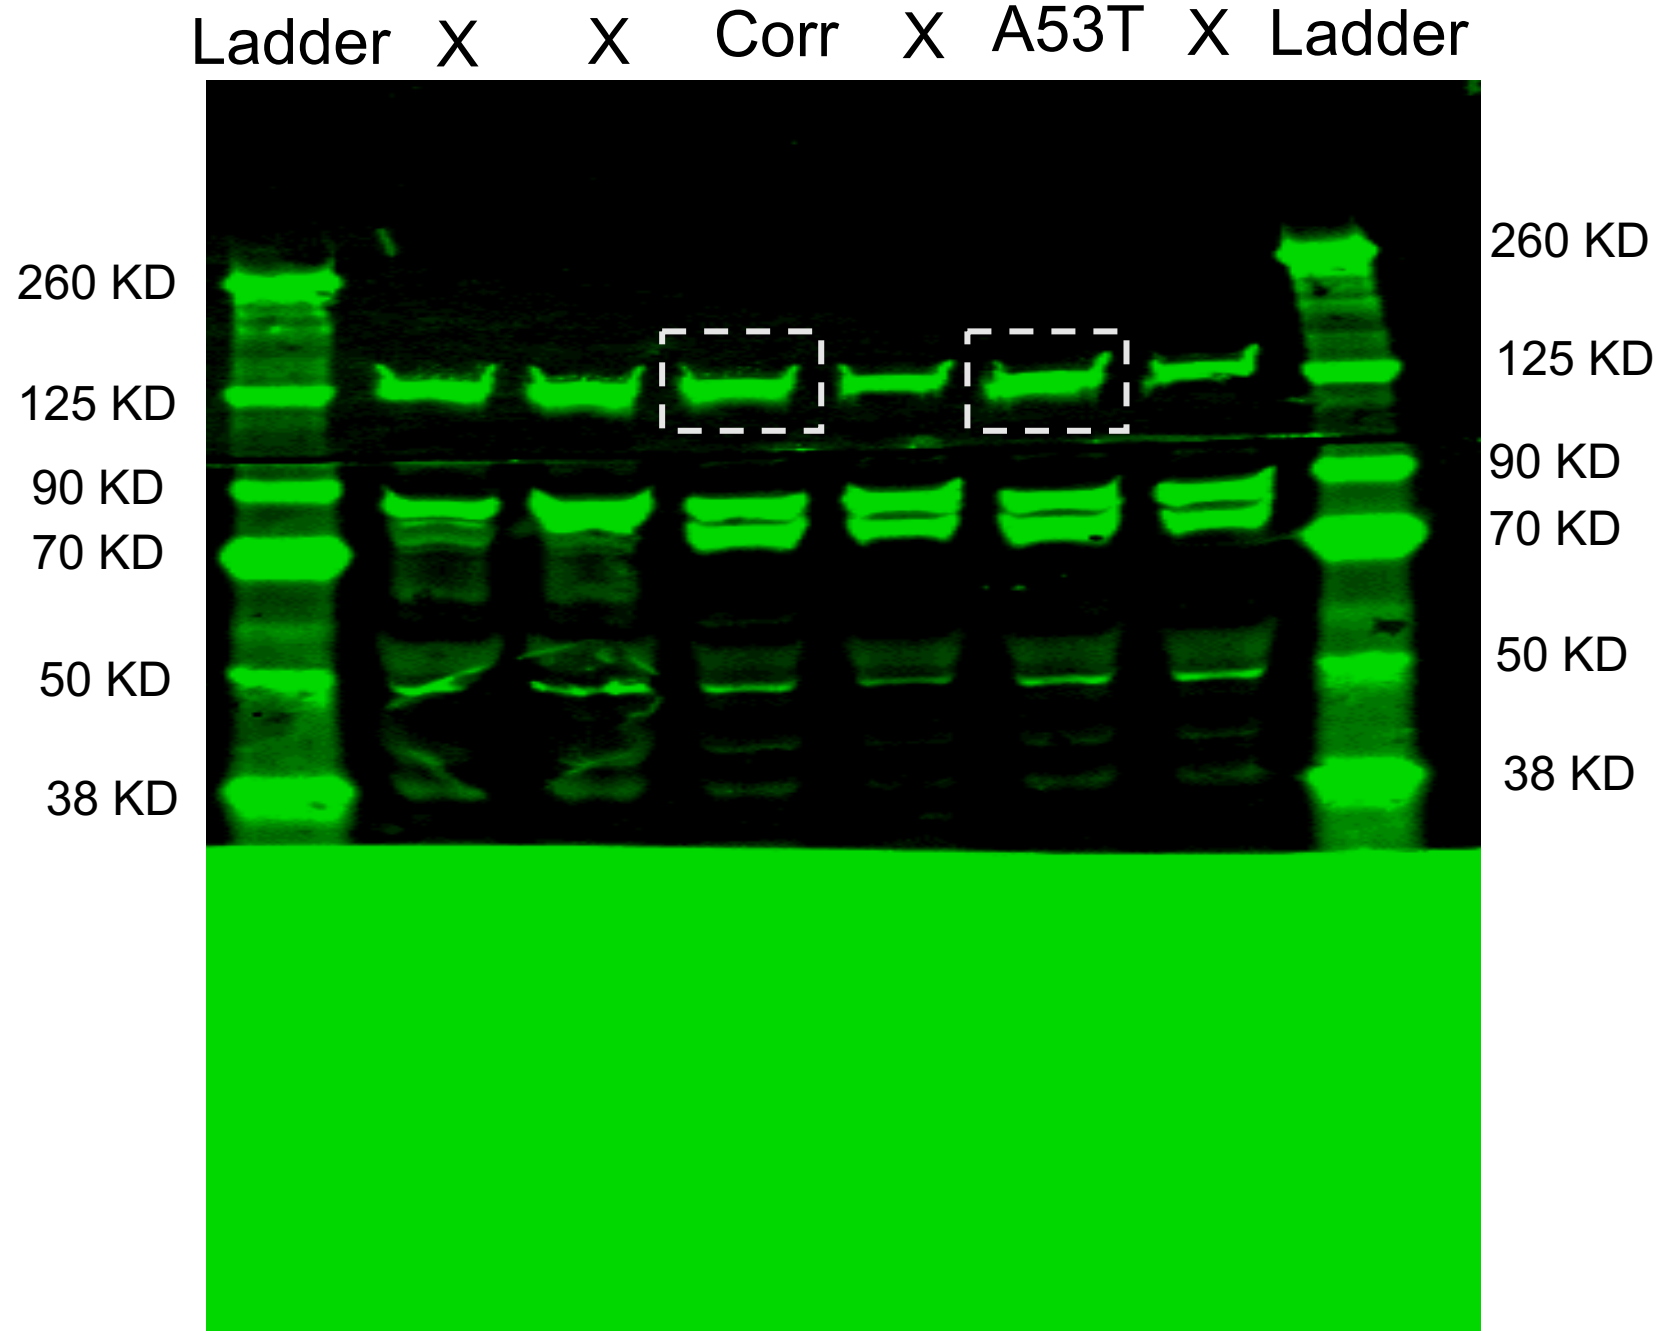

Blot was cut, both pieces included

**Figure 4B: pS129  $\alpha$ -Syn Panels**

S3 – Disease NSC

KD – Isogenic Control NSC

Imaged with LiCor Odyssey Dlx System

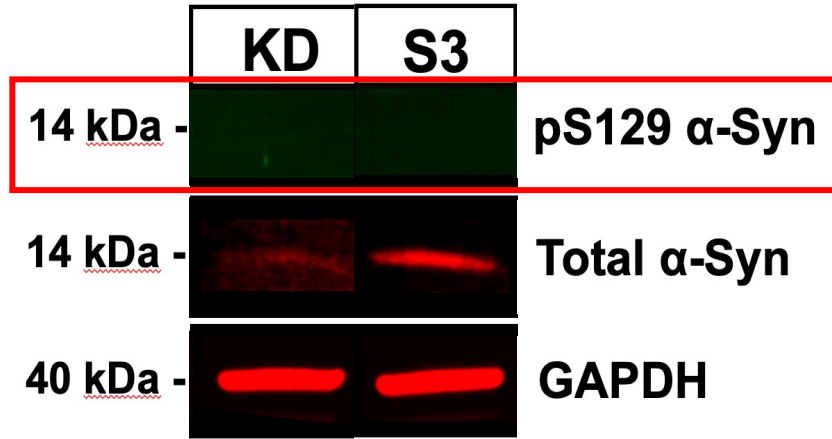

Blot was cut, only bottom piece included

Ladder X S3 X KD X X Ladder

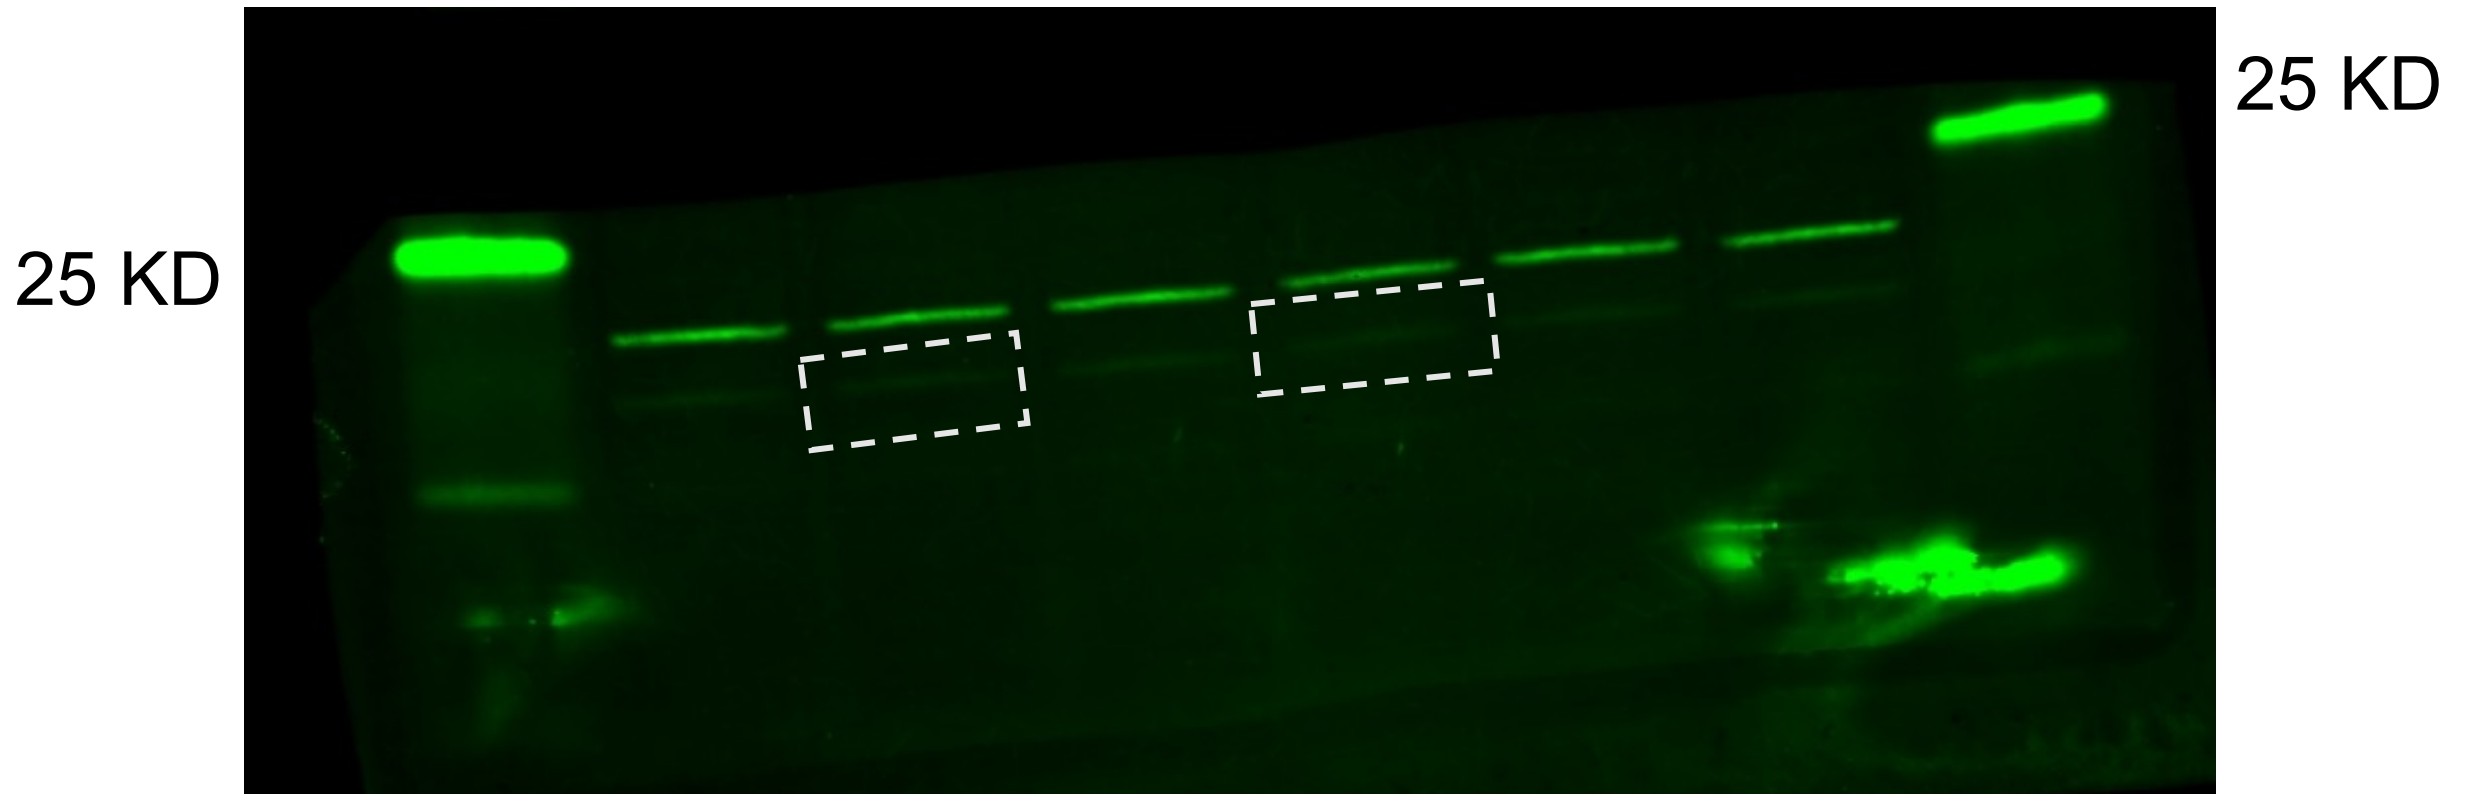

**Figure 4B: Total  $\alpha$ -Syn Panels**

S3 – Disease NSC

KD – Isogenic Control NSC

Imaged with LiCor Odyssey Dlx System

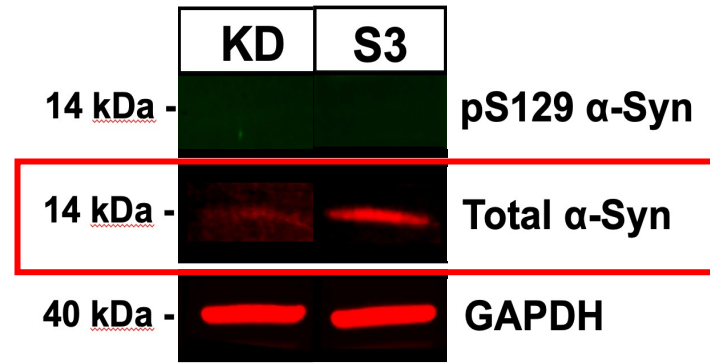

Blot was cut, only bottom piece included

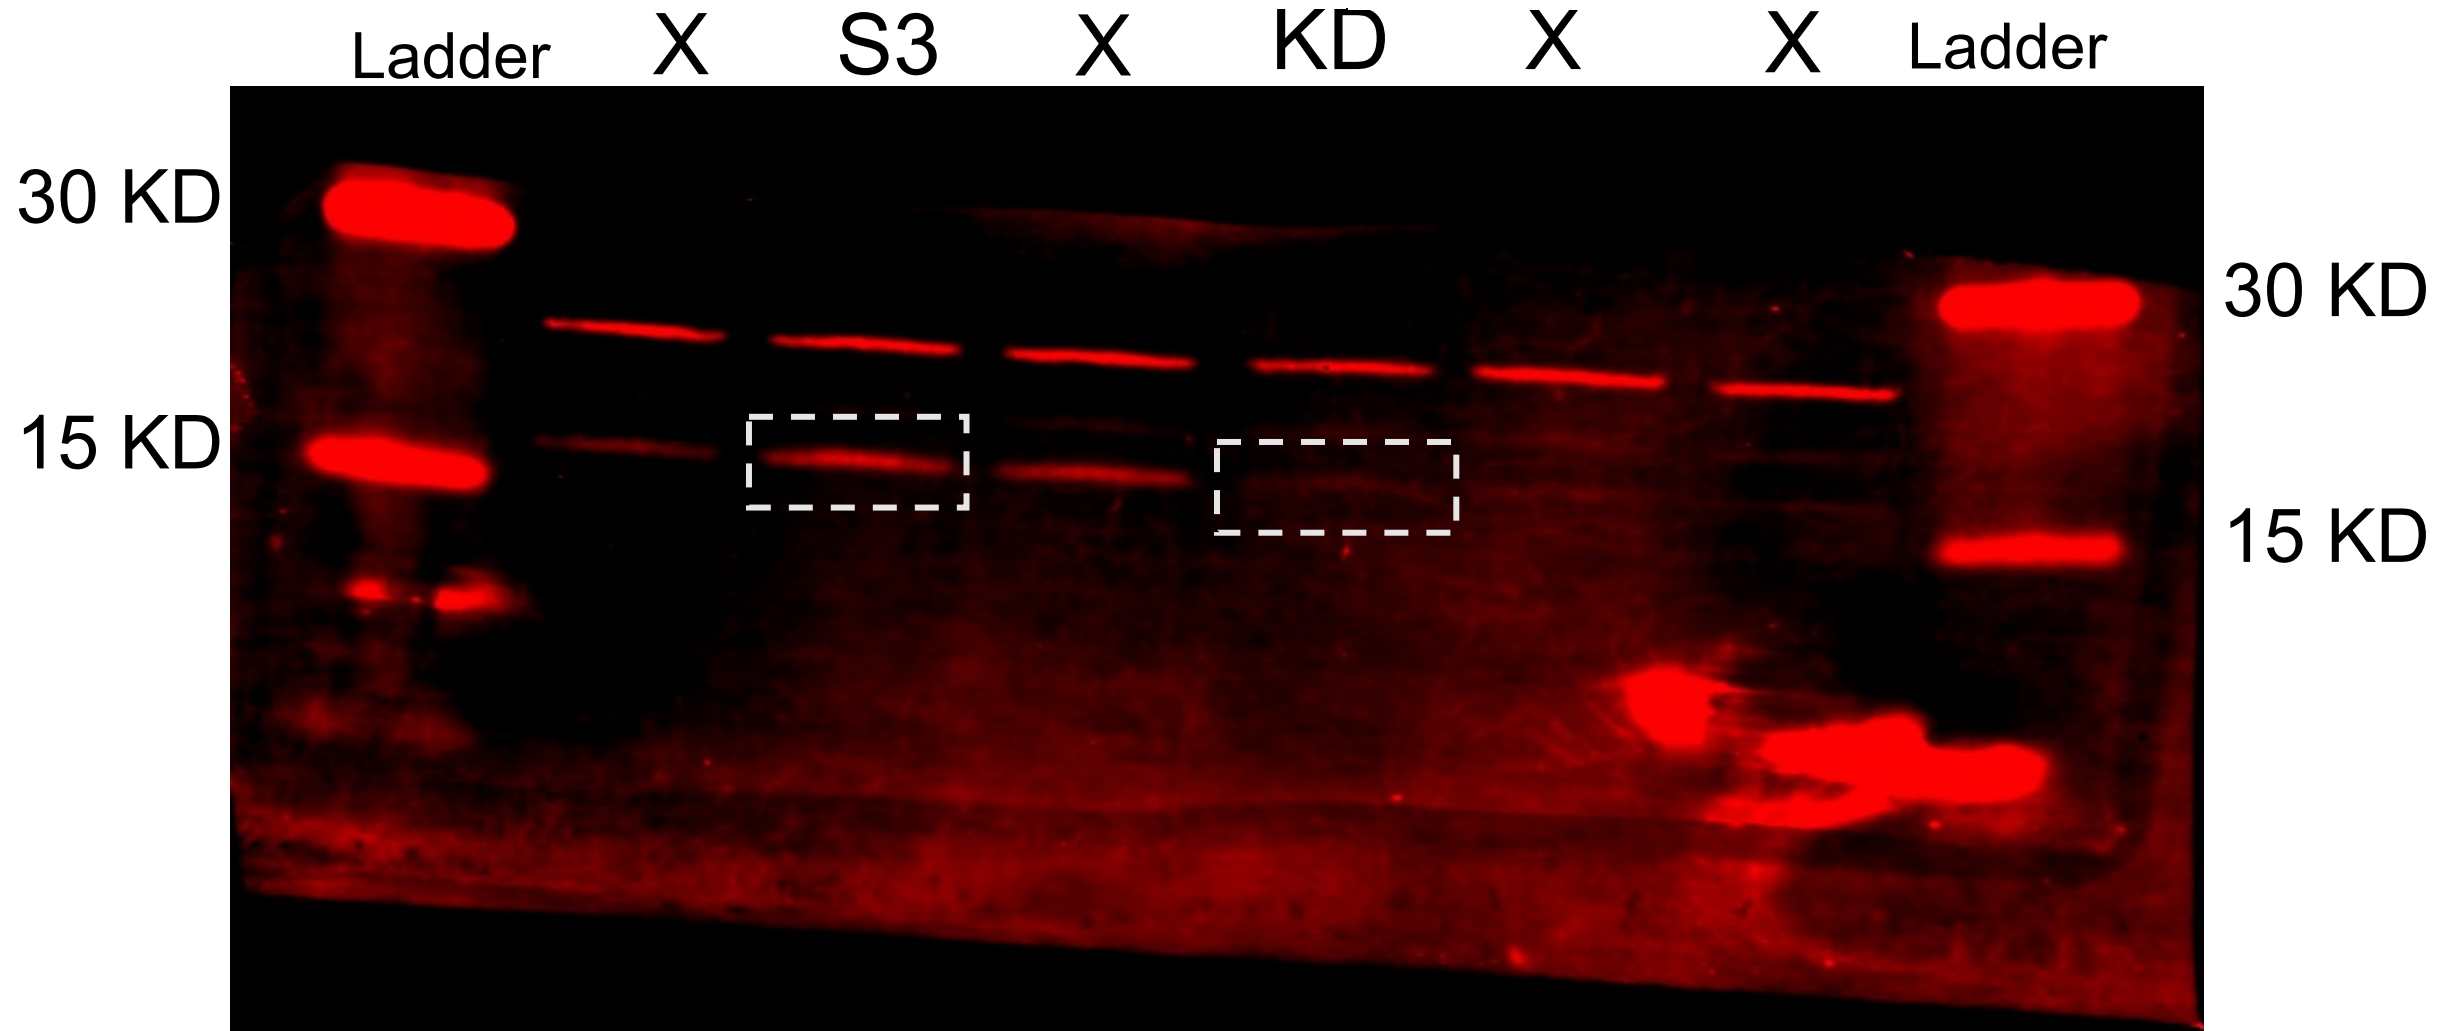

**Figure 4B:**

GAPDH Panels

S3 – Disease NSC

KD – Isogenic

Control NSC

Imaged with LiCor

Odyssey Dlx System

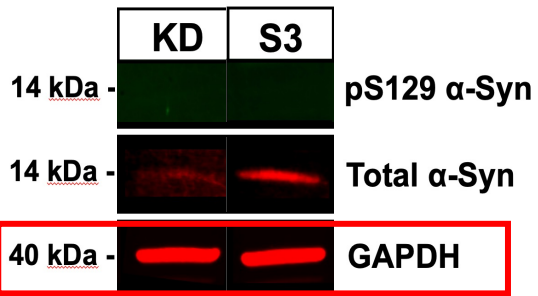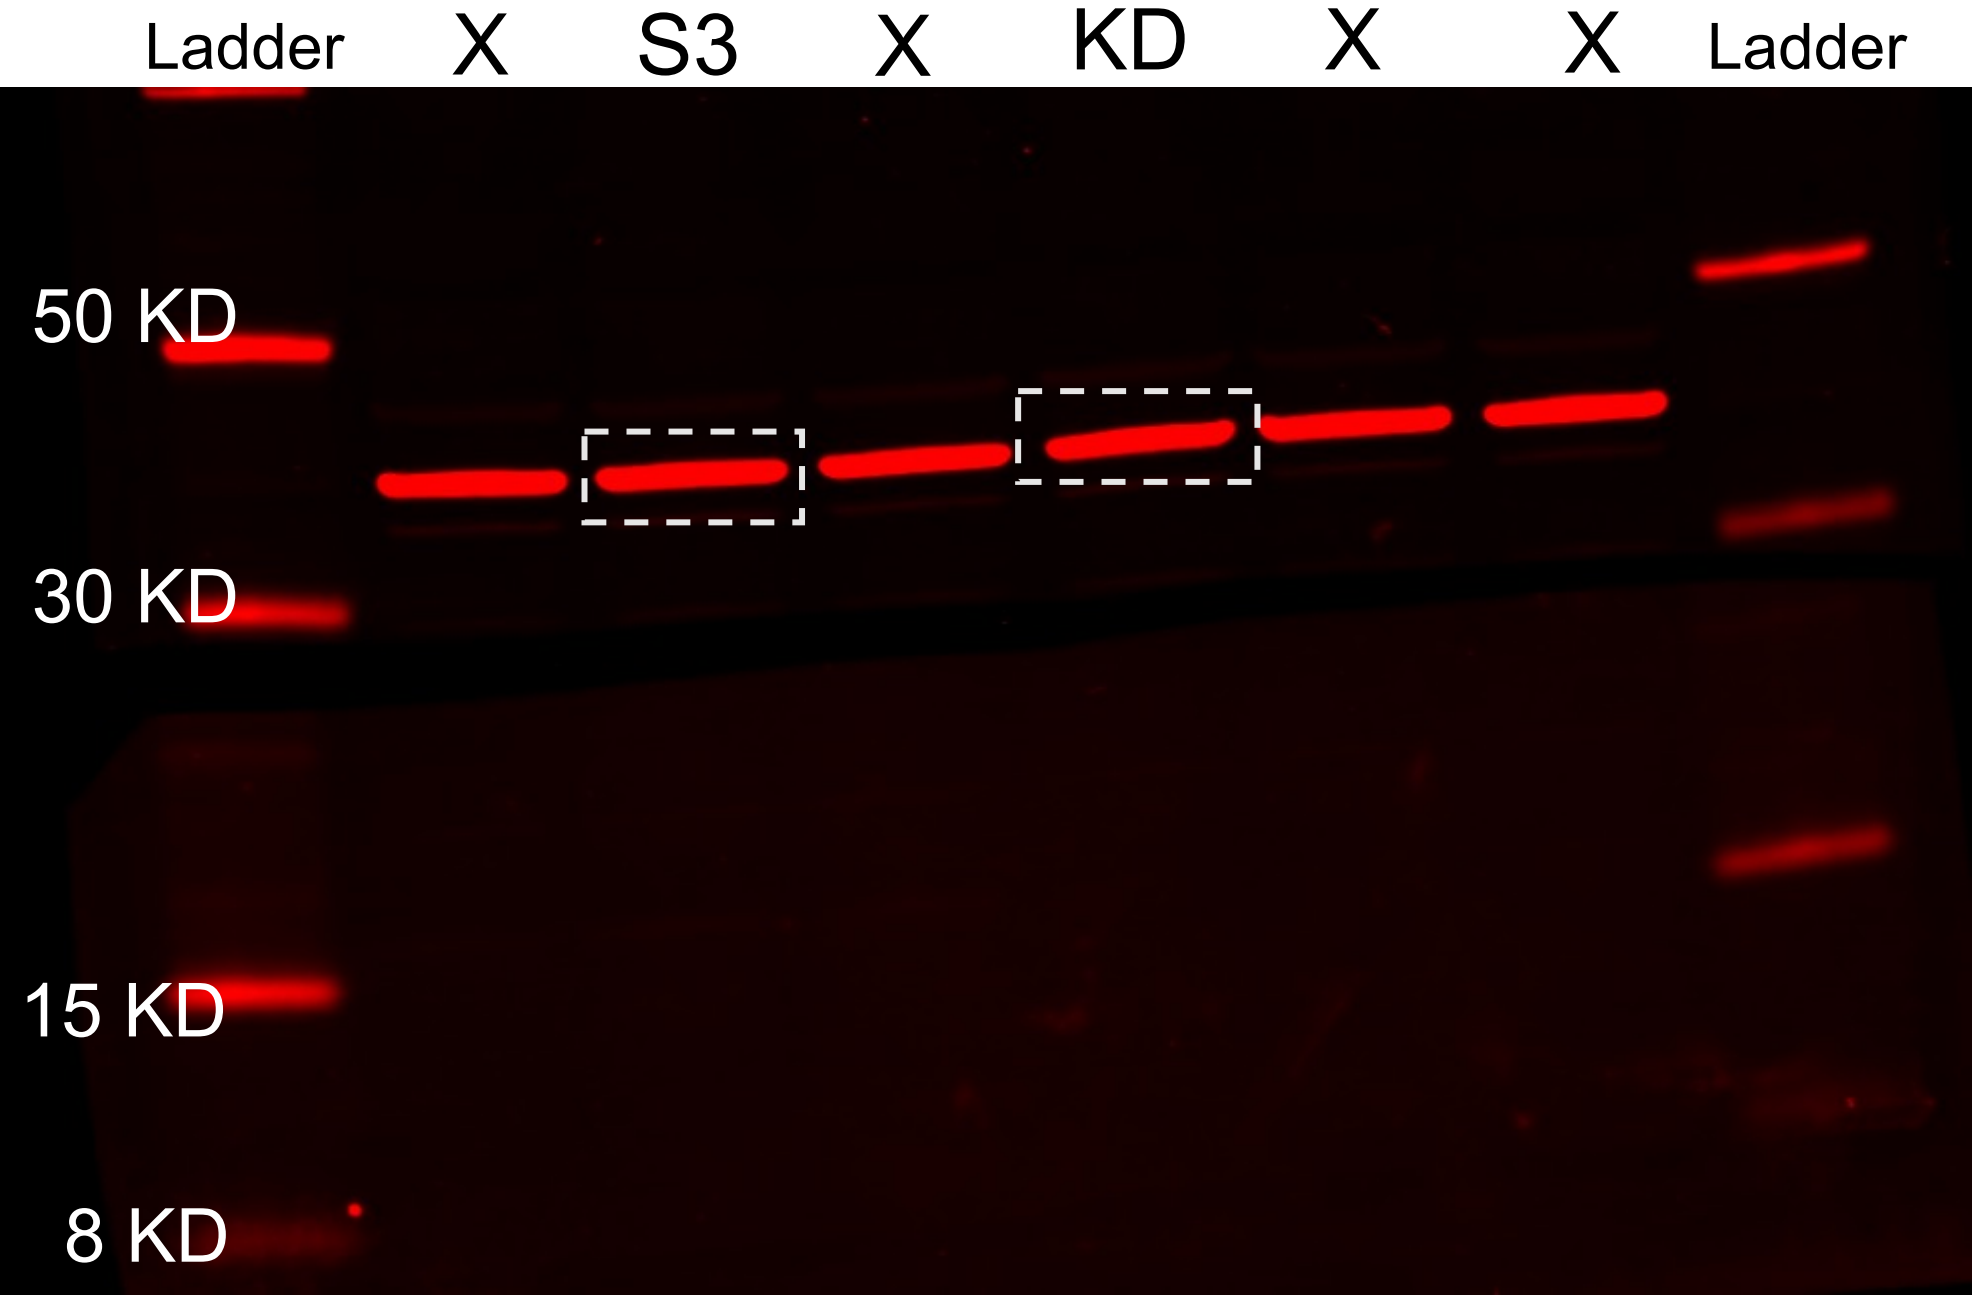

Blot was cut, only bottom piece included

**Figure 4E: Vinculin and pS129 α-Syn Panels**

A53T – Disease  
Neurospheres  
Corr – Isogenic  
Control  
Neurospheres

Imaged with  
LiCor Odyssey  
Dlx System

Blot was cut, the two cut  
pieces are shown

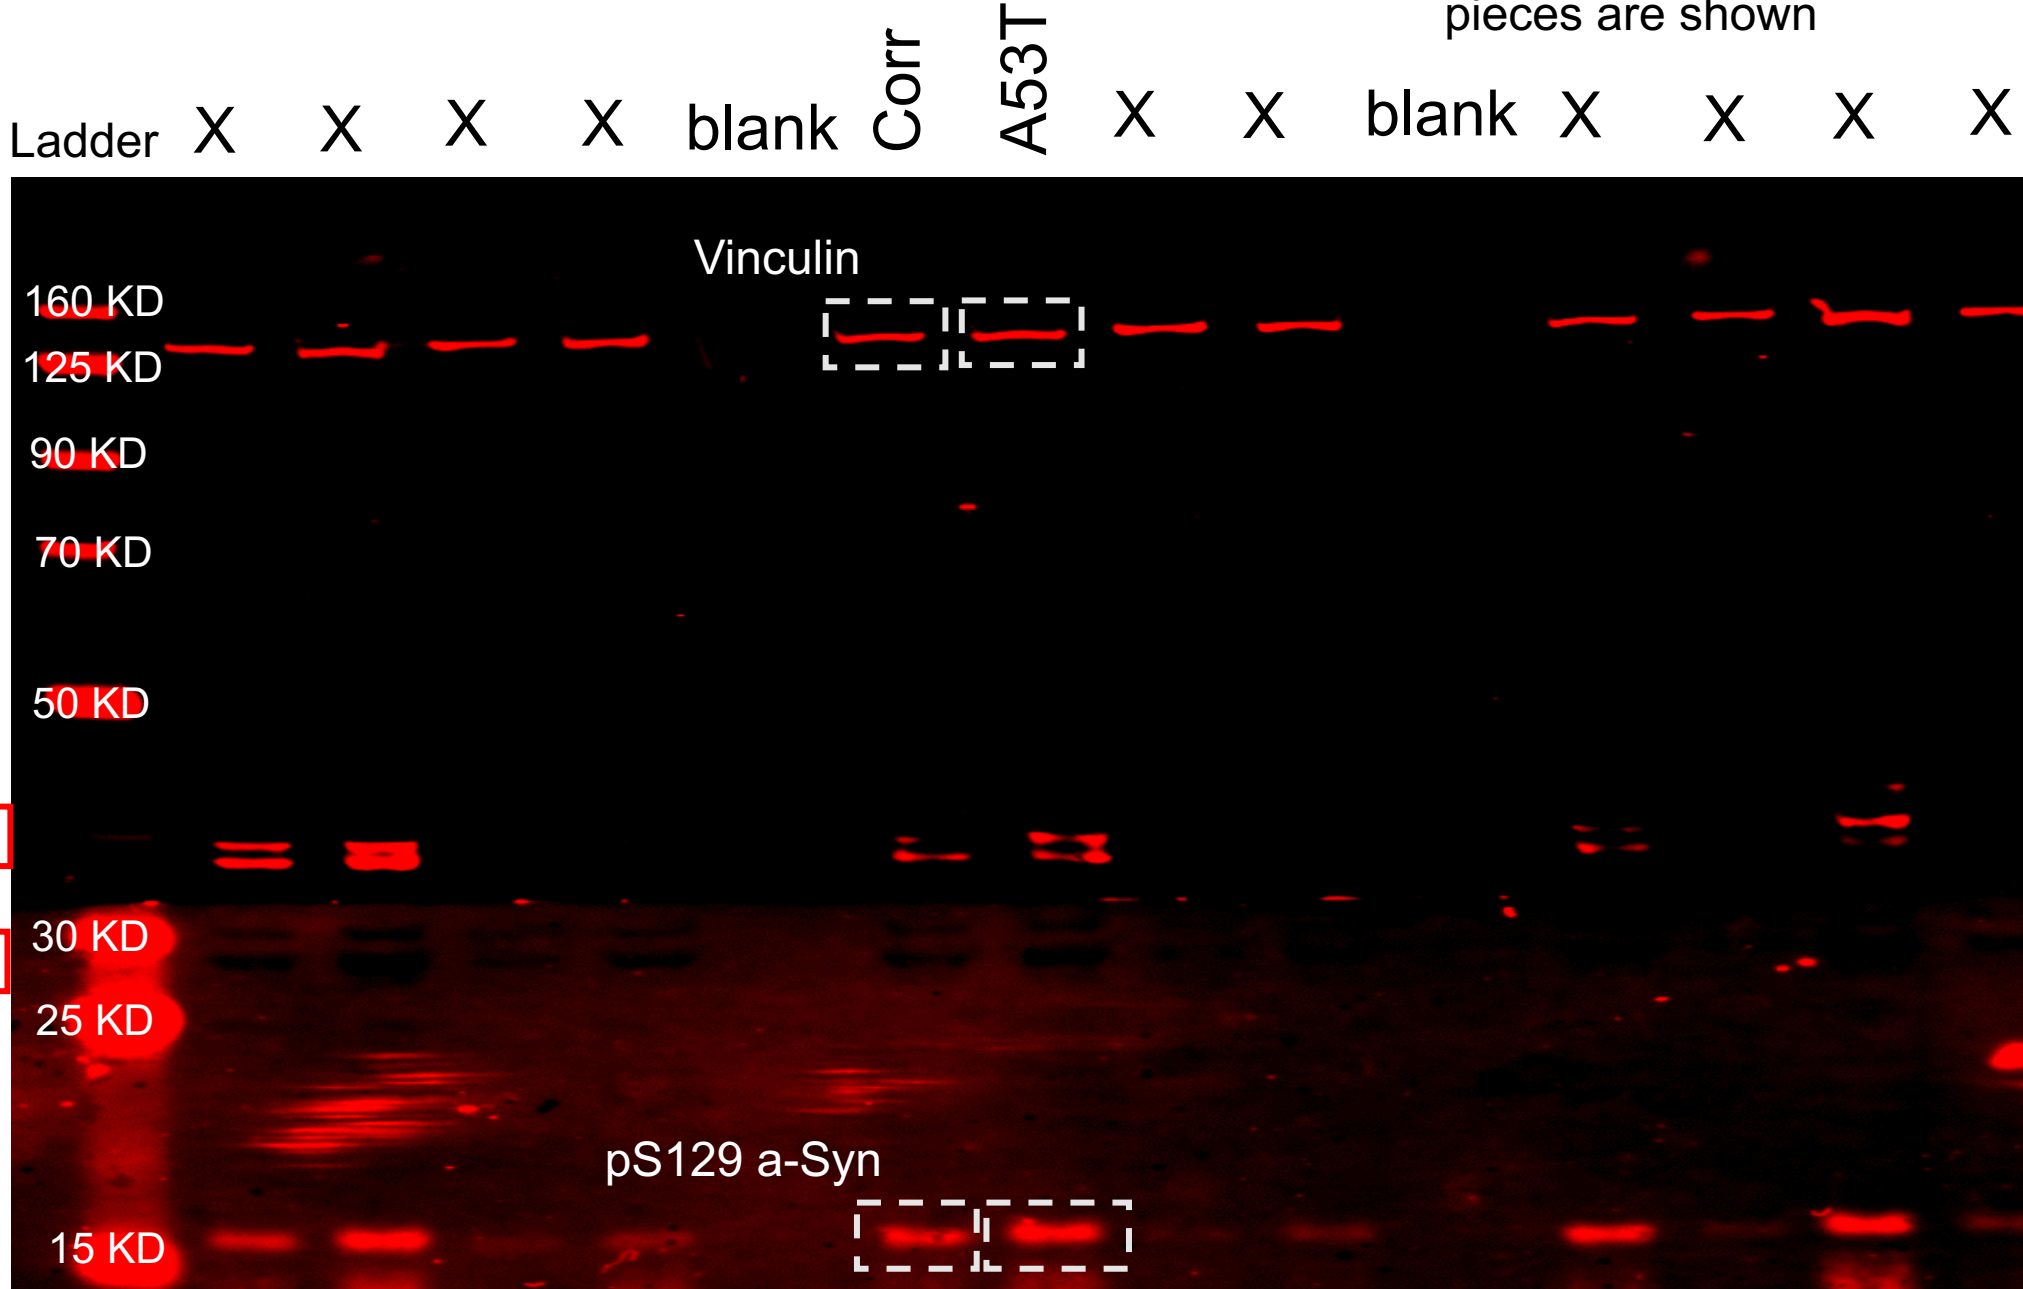

|           | Corr | A53T |             |
|-----------|------|------|-------------|
| 14 kDa -  |      |      | pS129 α-Syn |
| 14 kDa -  |      |      | α-Syn       |
| 120 kDa - |      |      | Vinculin    |

**Figure 4E: Total  $\alpha$ -Syn Panels**

Blot was cut, the two cut pieces are shown

A53T – Disease Neurospheres  
 Corr – Isogenic Control Neurospheres

Imaged with LiCor Odyssey Dlx System

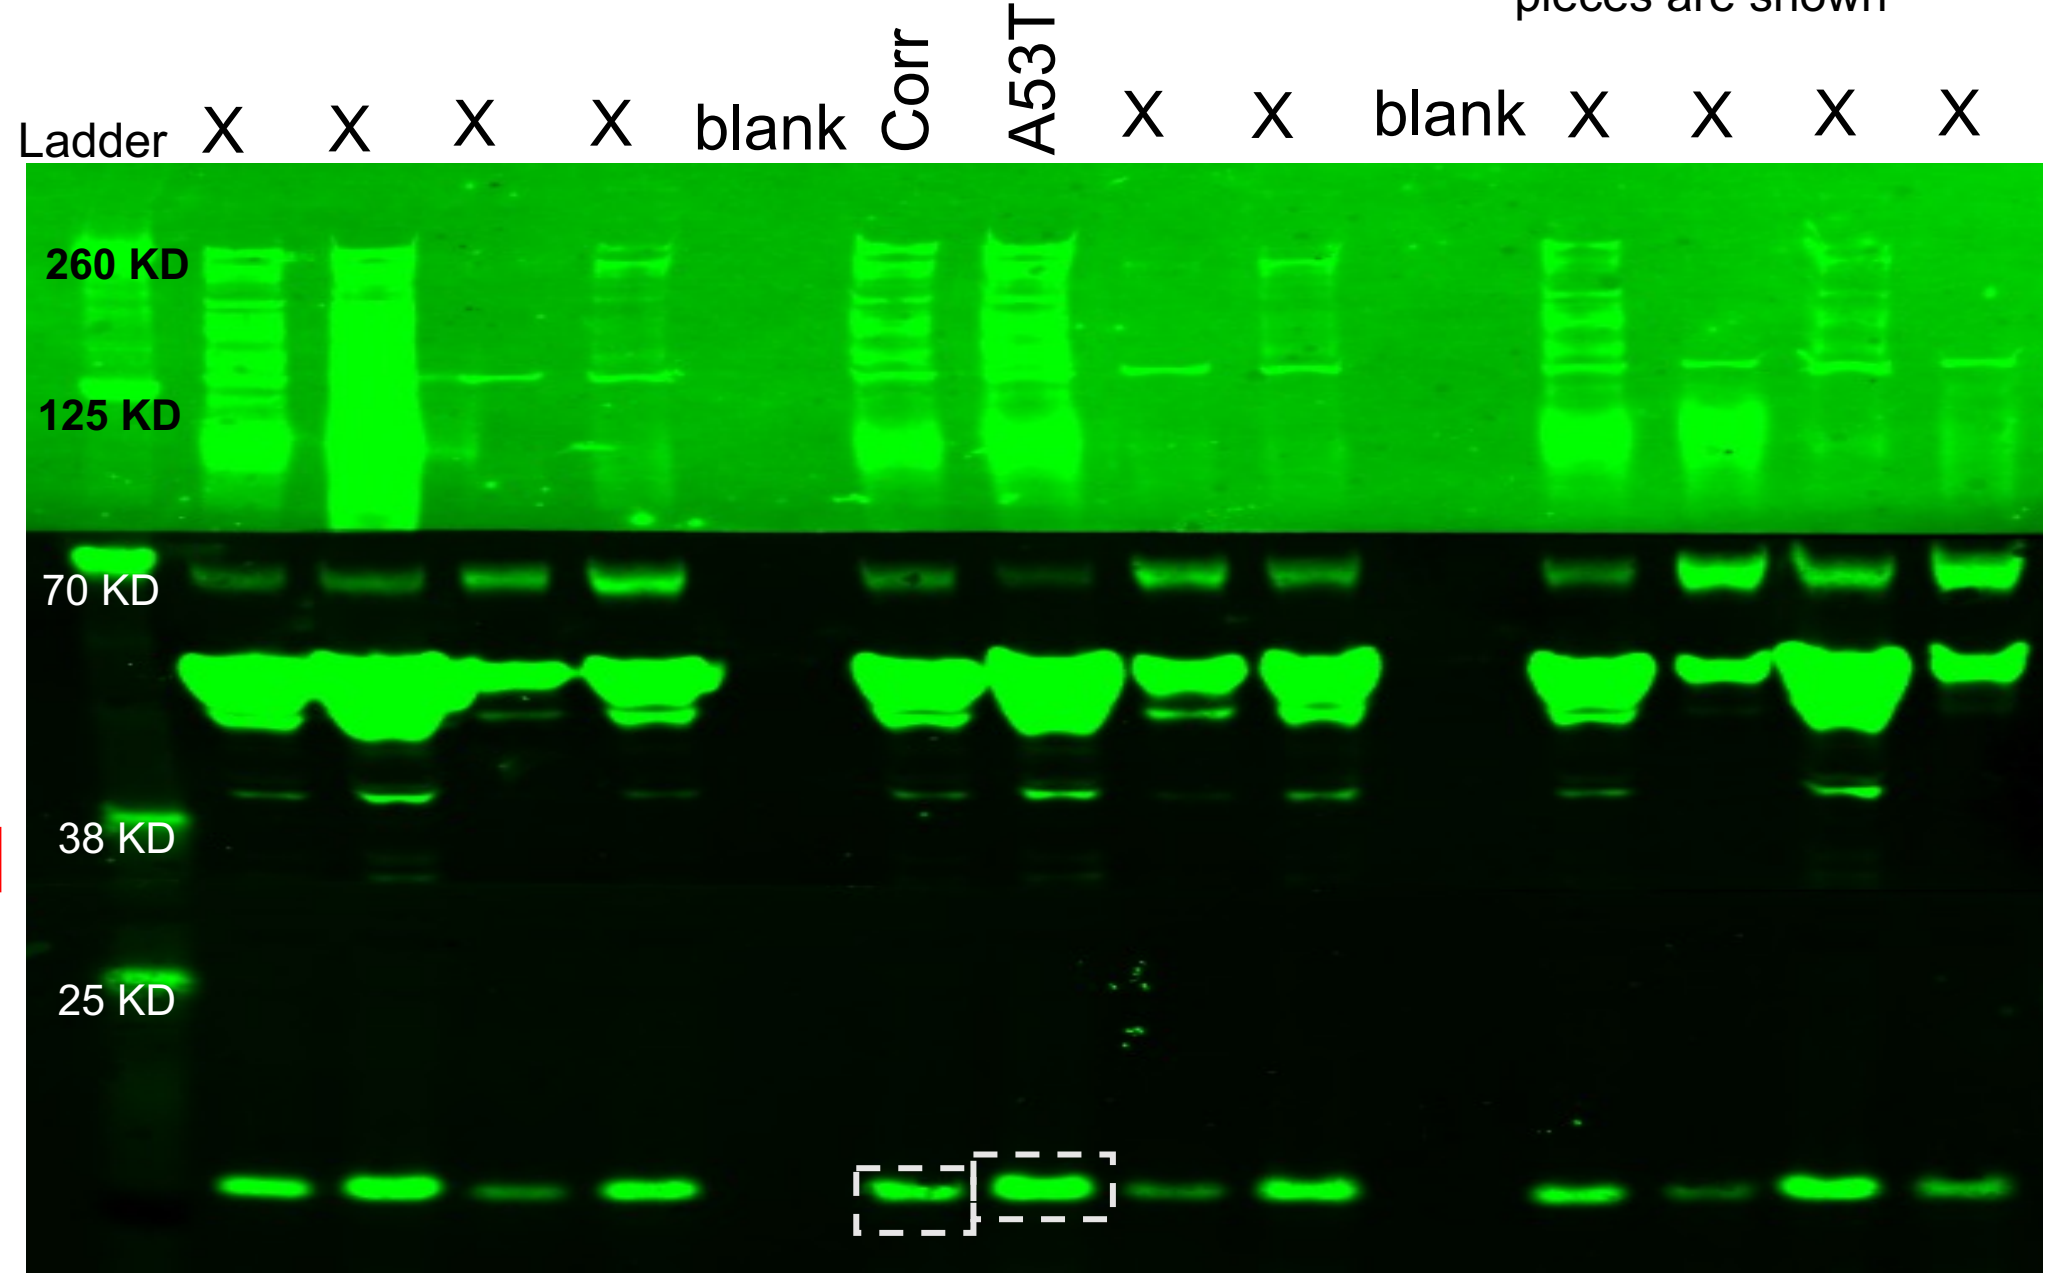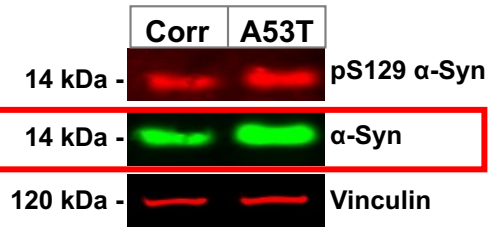



**Figure 4F:** pS129  $\alpha$ -Syn

Panels

S3 – Disease  
Neurospheres  
KD – Isogenic Control  
Neurospheres

Imaged with LiCor Odyssey  
Dlx System

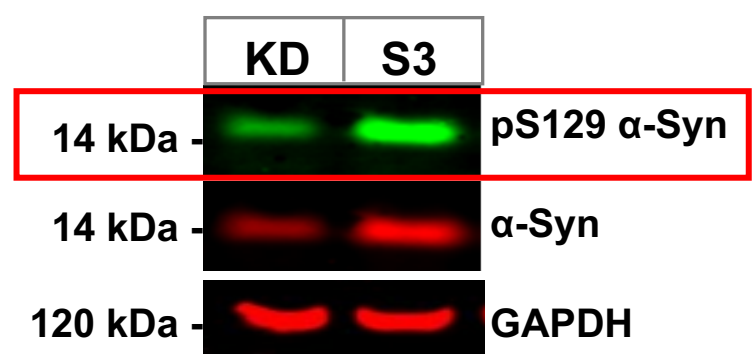

Blot was cut, the two cut  
pieces are shown

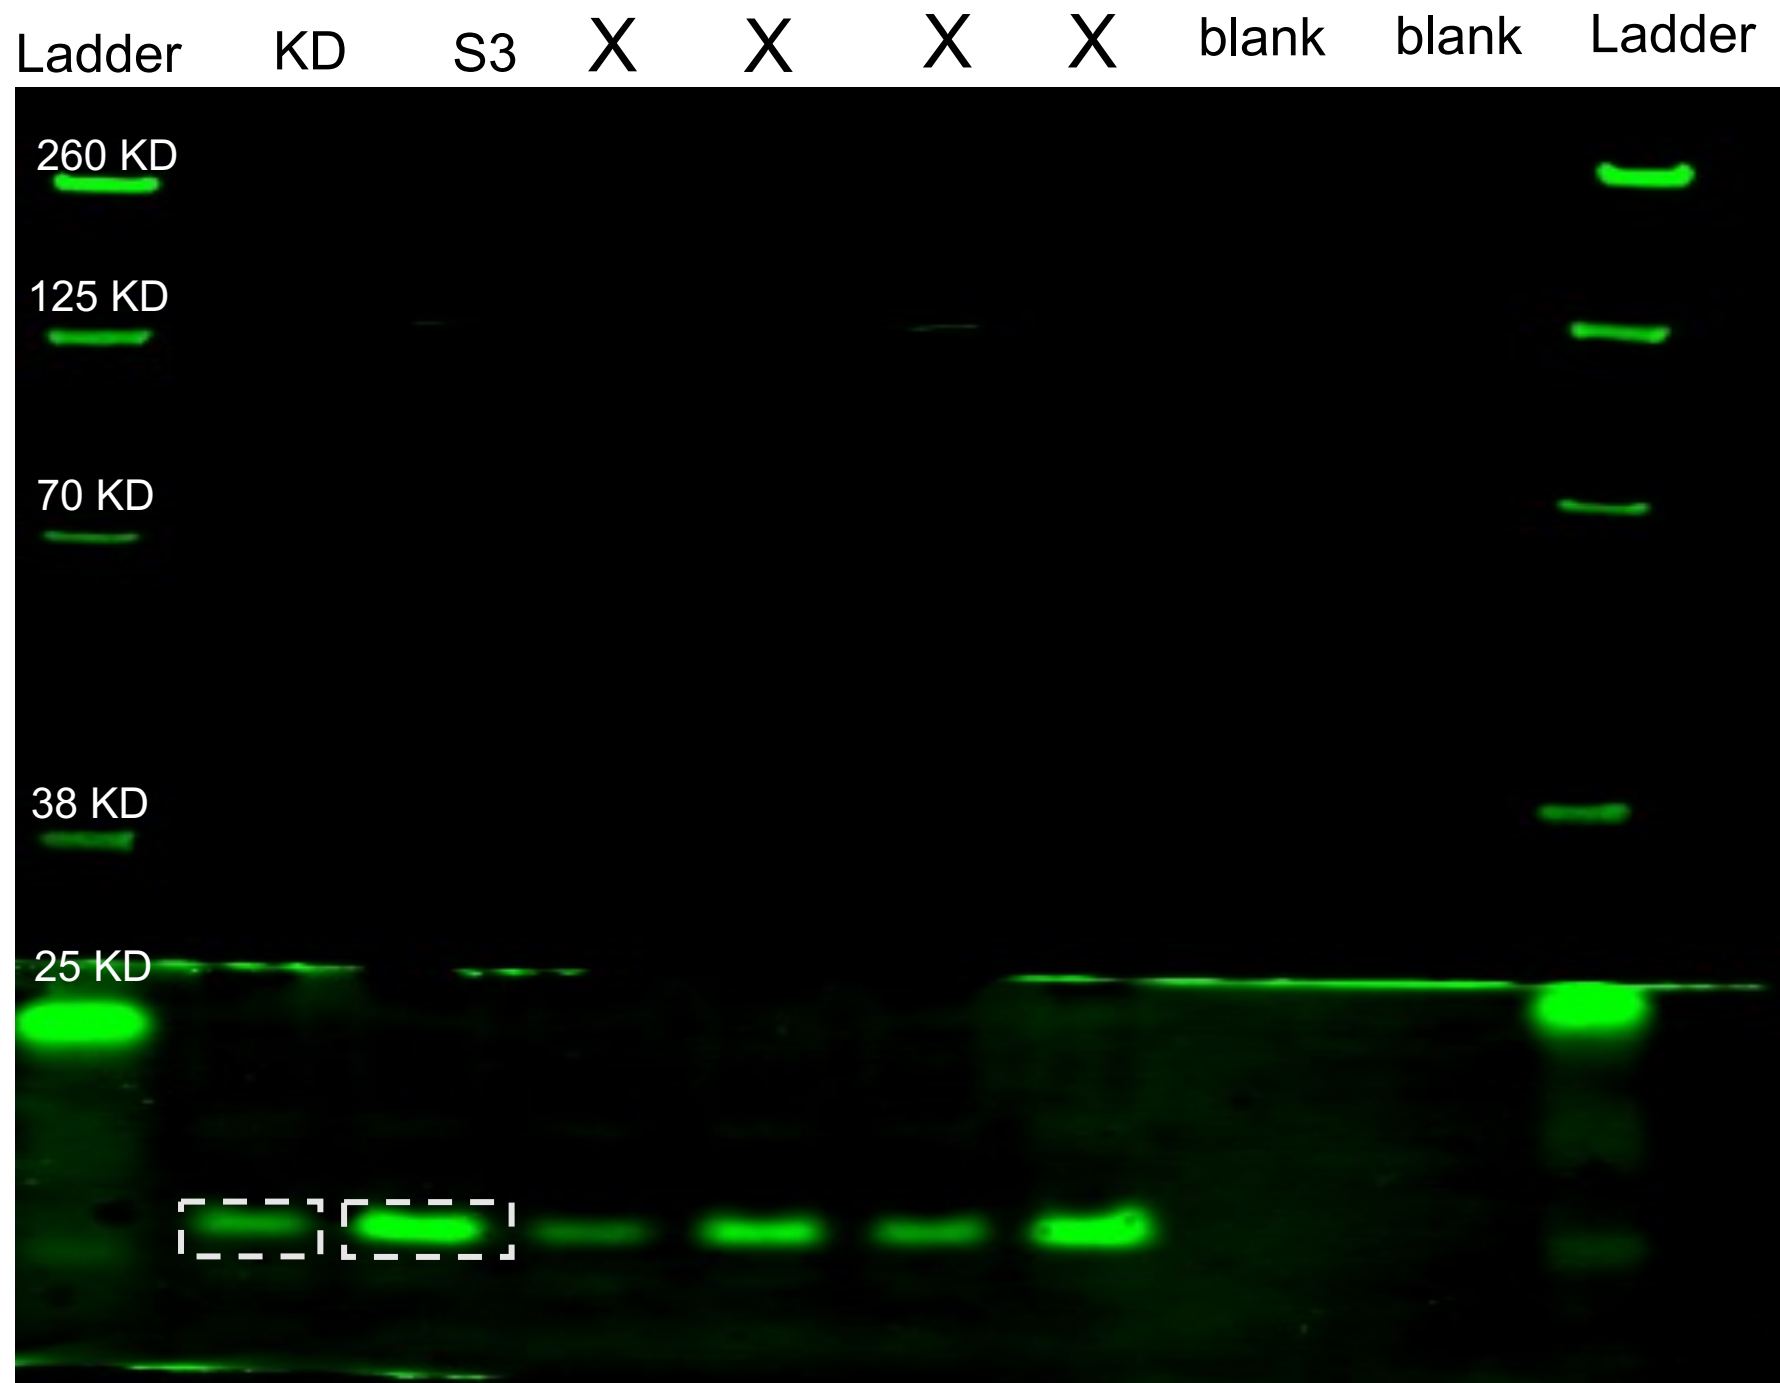

**Figure 4F:**

Total  $\alpha$ -Syn and GAPDH  
Panels

S3 – Disease  
Neurospheres  
KD – Isogenic  
Control  
Neurospheres

Imaged with  
LiCor Odyssey  
Dlx System

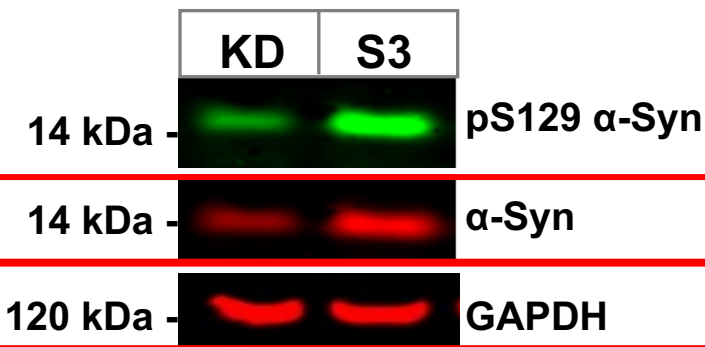

Blot was cut, the two cut  
pieces are shown

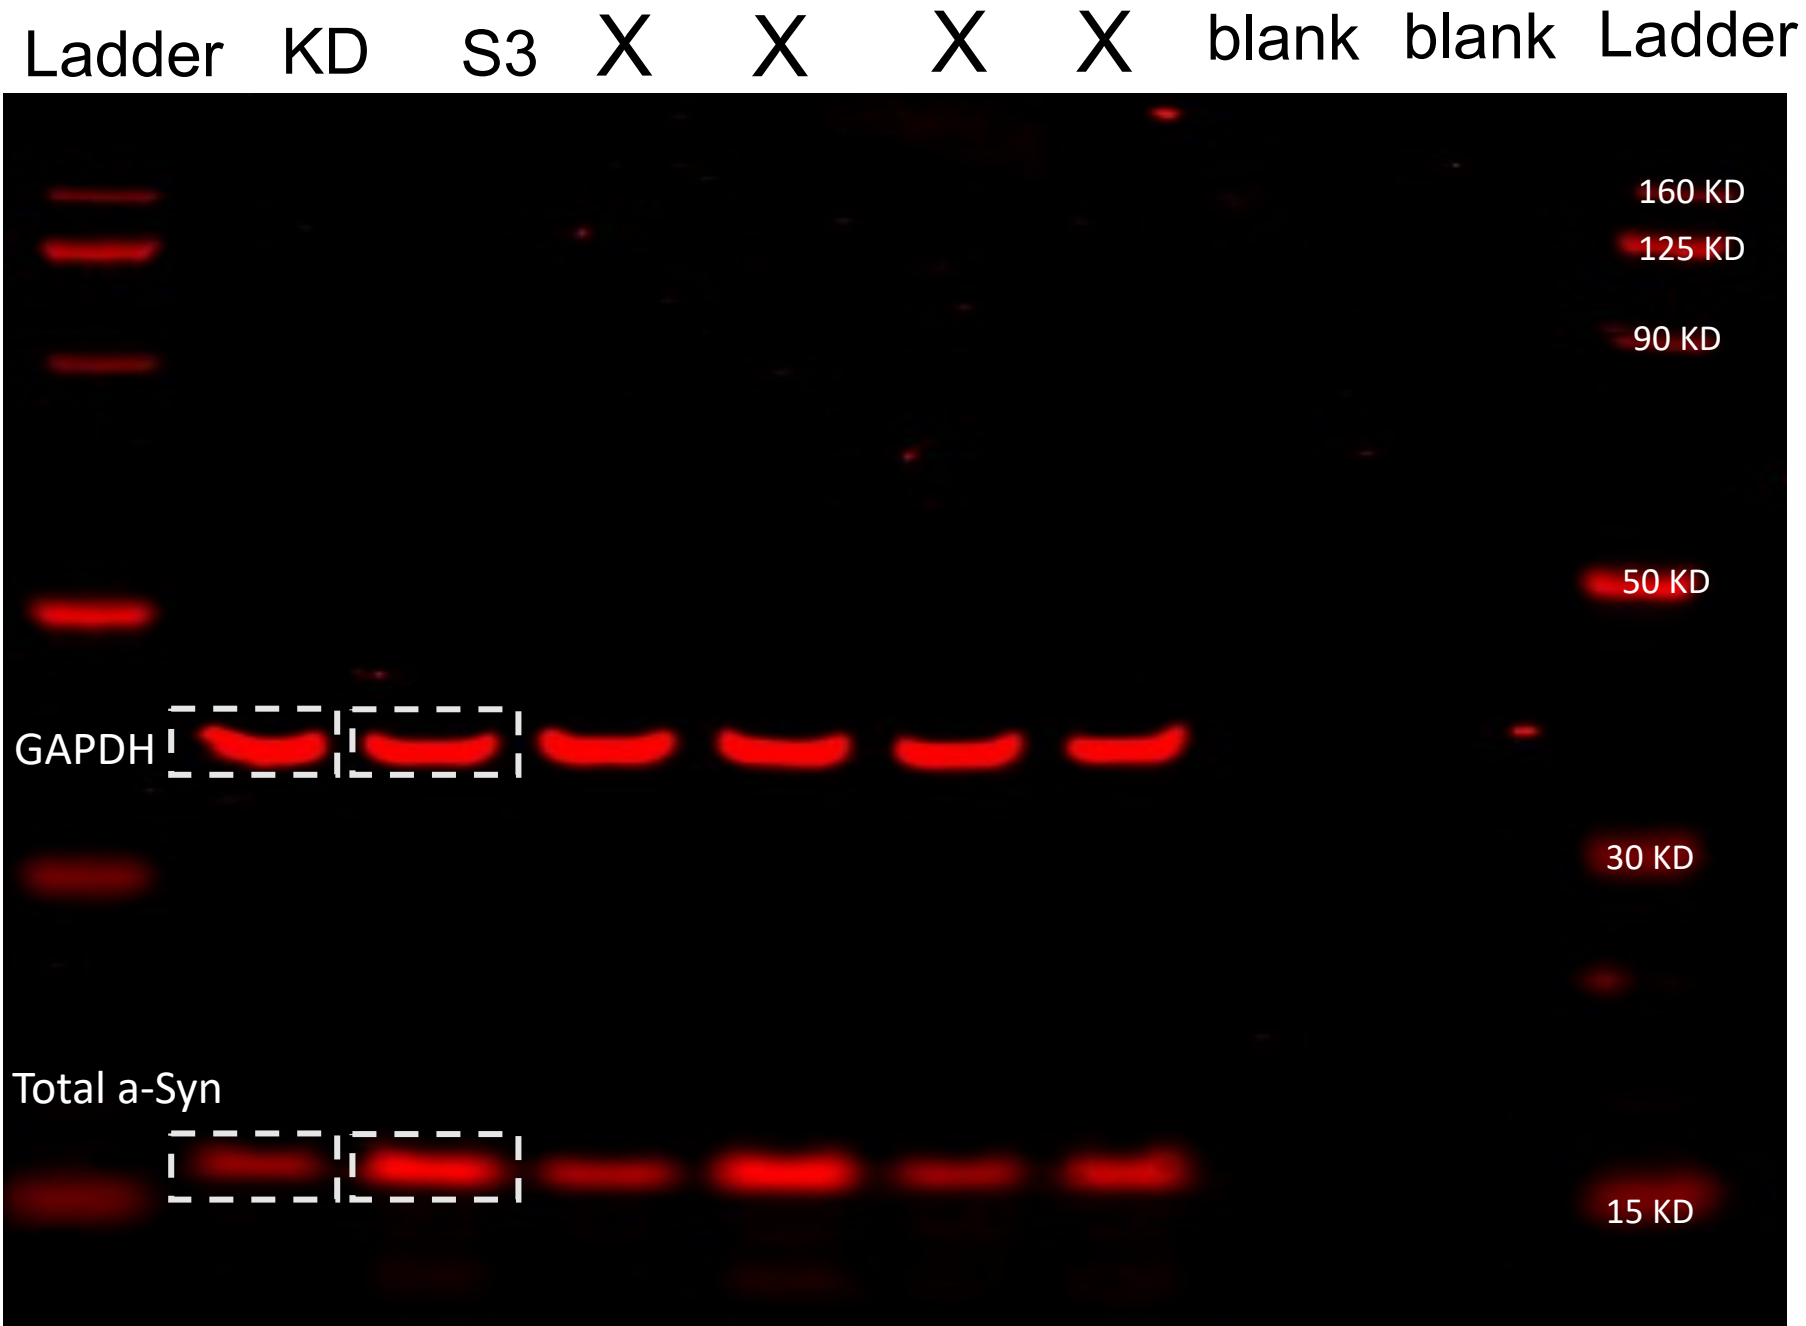

**Figure 5C: Vinculin Panels**  
 Imaged with LiCor Odyssey Dlx System

A53T DMSO – Disease Neurospheres treated with DMSO control

A53T Cay10566 – Disease Neurospheres treated with Cay10566

Corr DMSO – Isogenic Control Neurospheres treated with DMSO control

Corr Cay10566 – Isogenic Control Neurospheres treated with Cay10566

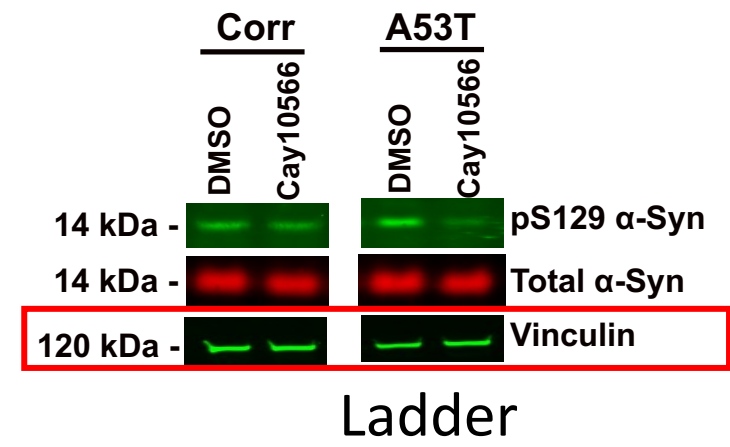

X

Corr DMSO

Corr Cay10566

X X

A53T DMSO

A53T Cay10566

X X X

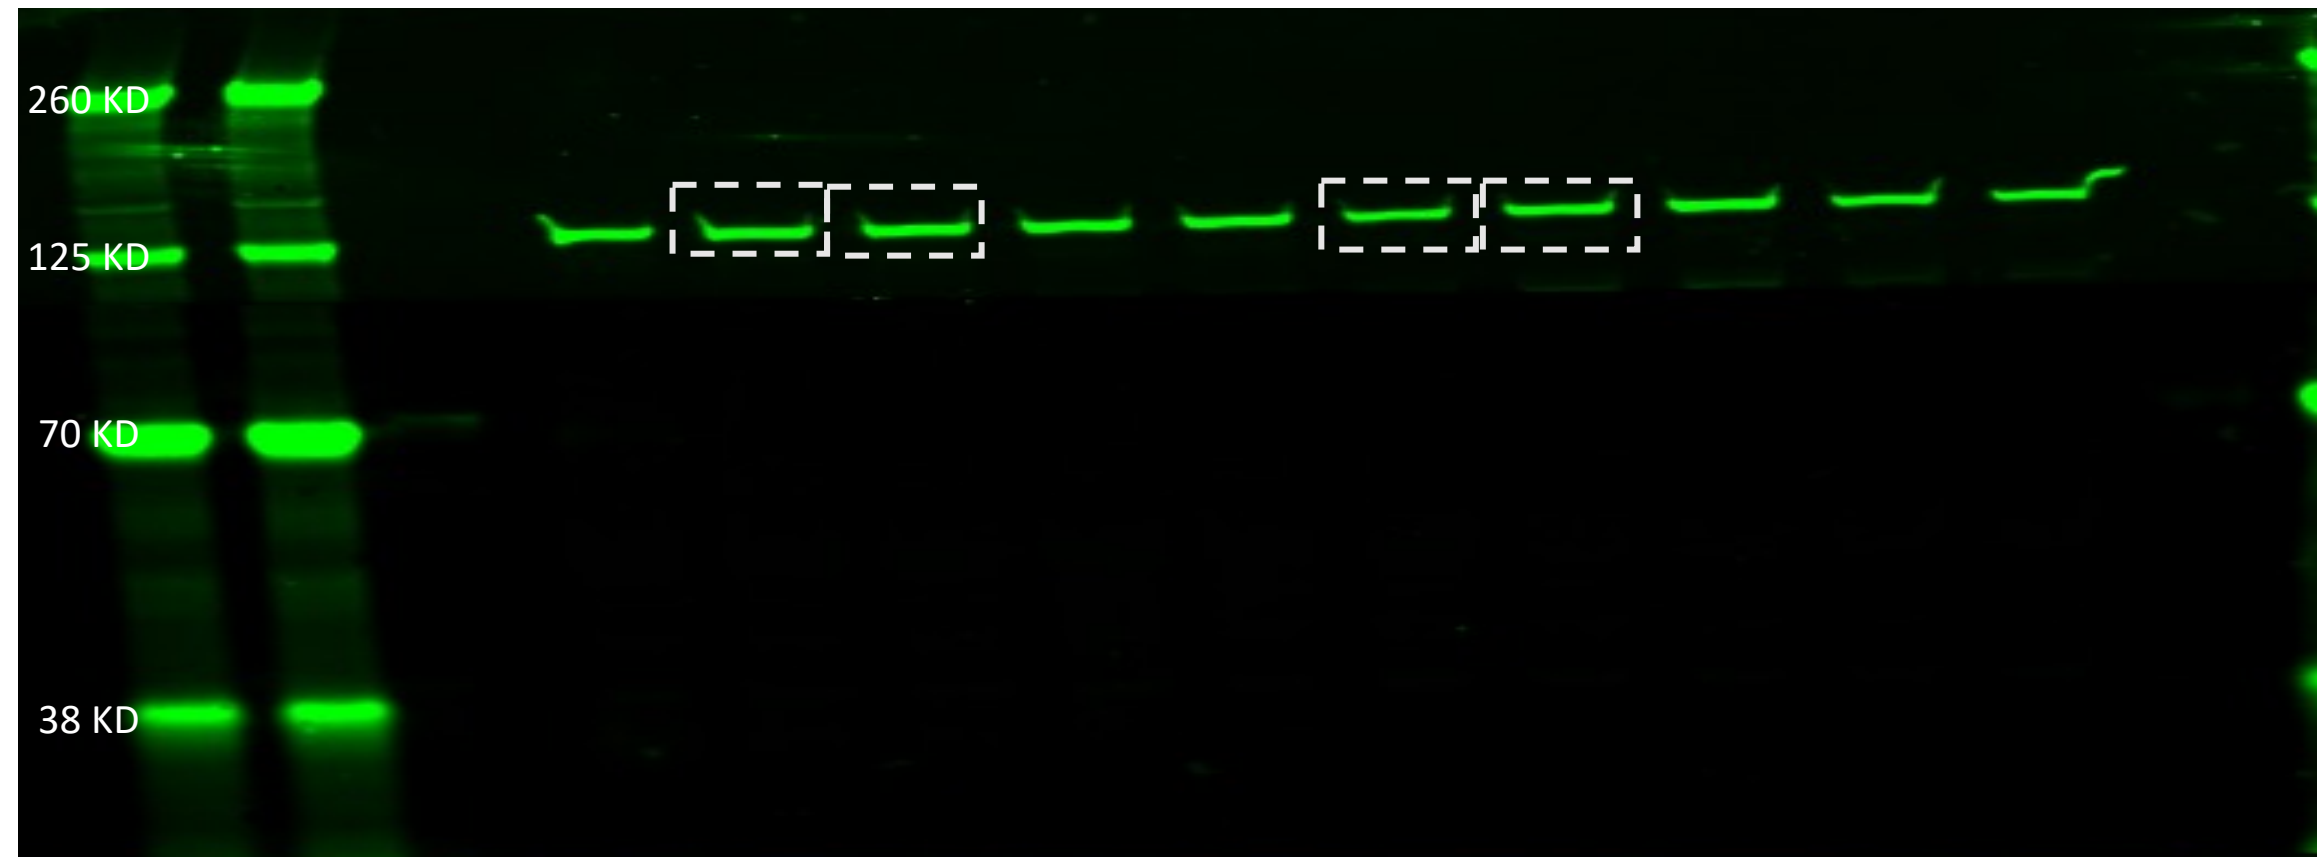

Blot was cut, only top piece is shown

**Figure 5C: pS129 a-Syn Panels**  
 Imaged with LiCor Odyssey Dlx System

A53T DMSO – Disease Neurospheres treated with DMSO control  
 A53T Cay10566 – Disease Neurospheres treated with Cay10566  
 Corr DMSO – Isogenic Control Neurospheres treated with DMSO control  
 Corr Cay10566 – Isogenic Control Neurospheres treated with Cay10566

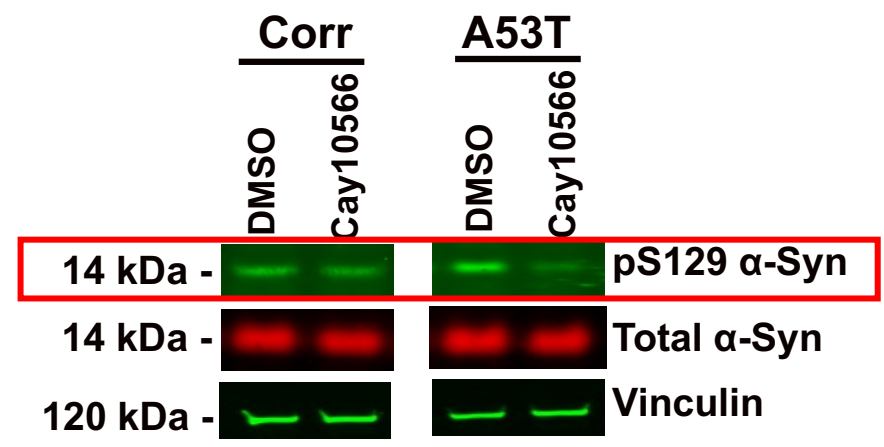

Ladder X Corr DMSO Corr Cay10566 X X A53T DMSO A53T Cay10566 X X X

Blot was cut, only bottom piece is shown

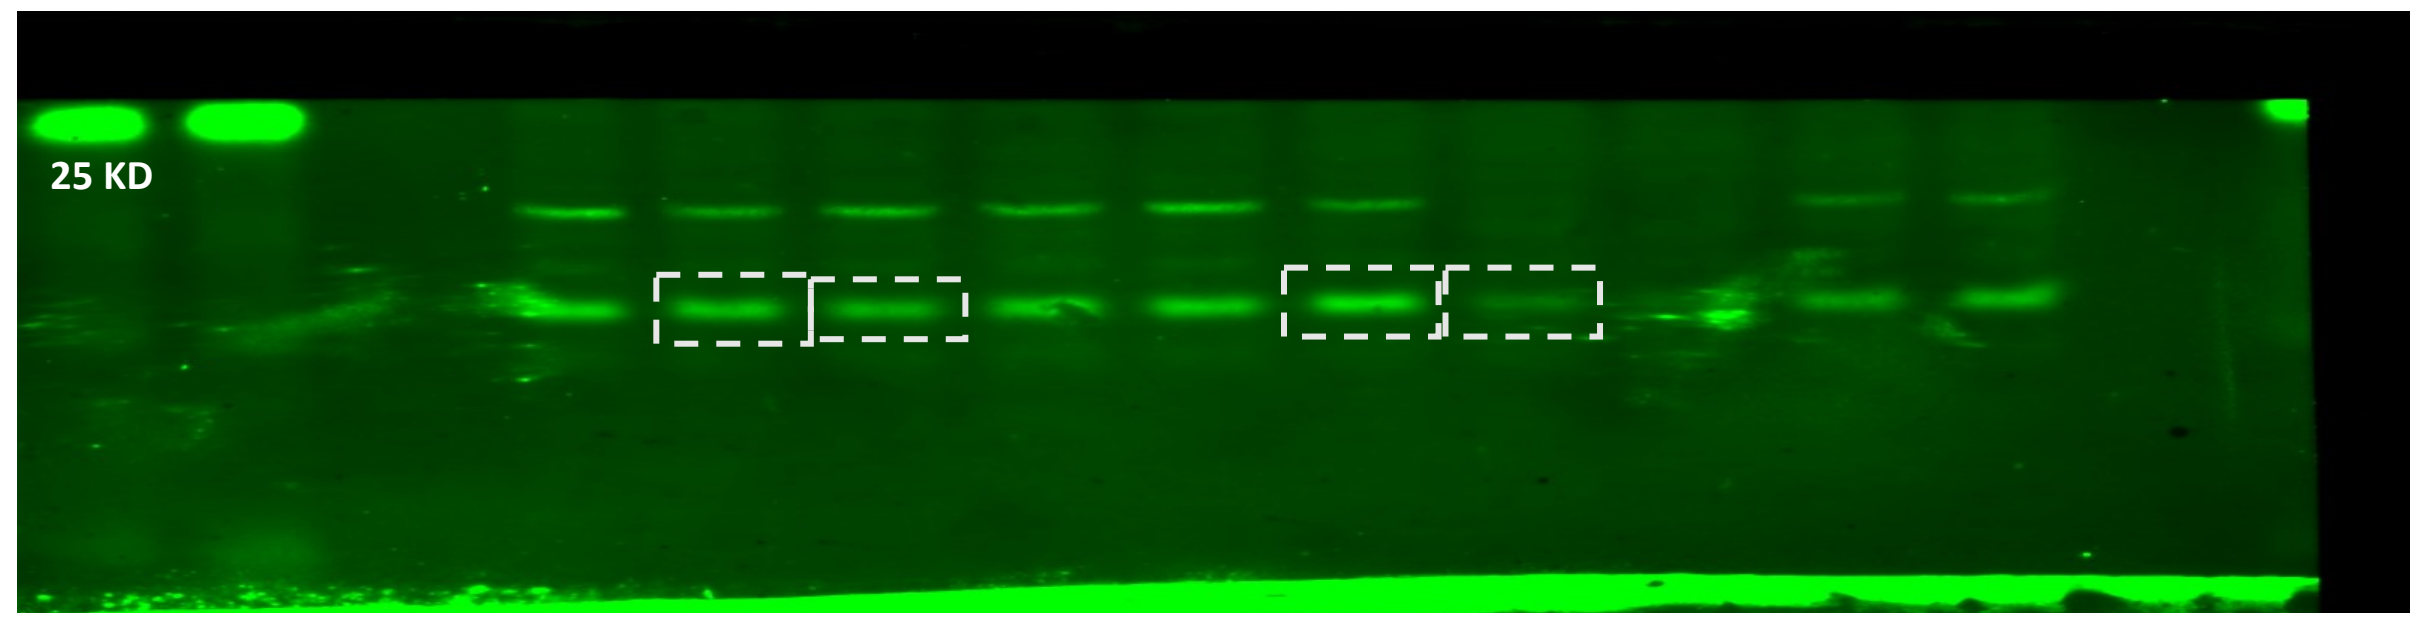



**Figure 5D: GAPDH Panels**  
Imaged with LiCor Odyssey Dlx System

S3 DMSO – Disease  
Neurospheres treated  
with DMSO control  
S3 Cay10566 –  
Disease Neurospheres  
treated with Cay10566  
KD DMSO – Isogenic  
Control Neurospheres  
treated with DMSO  
control  
KD Cay10566 –  
Isogenic Control  
Neurospheres treated  
with Cay10566

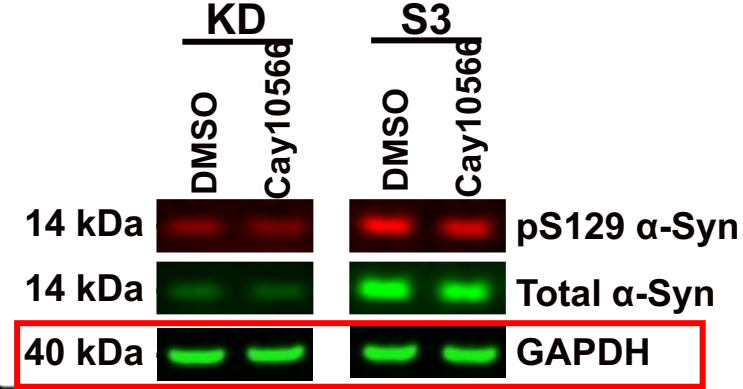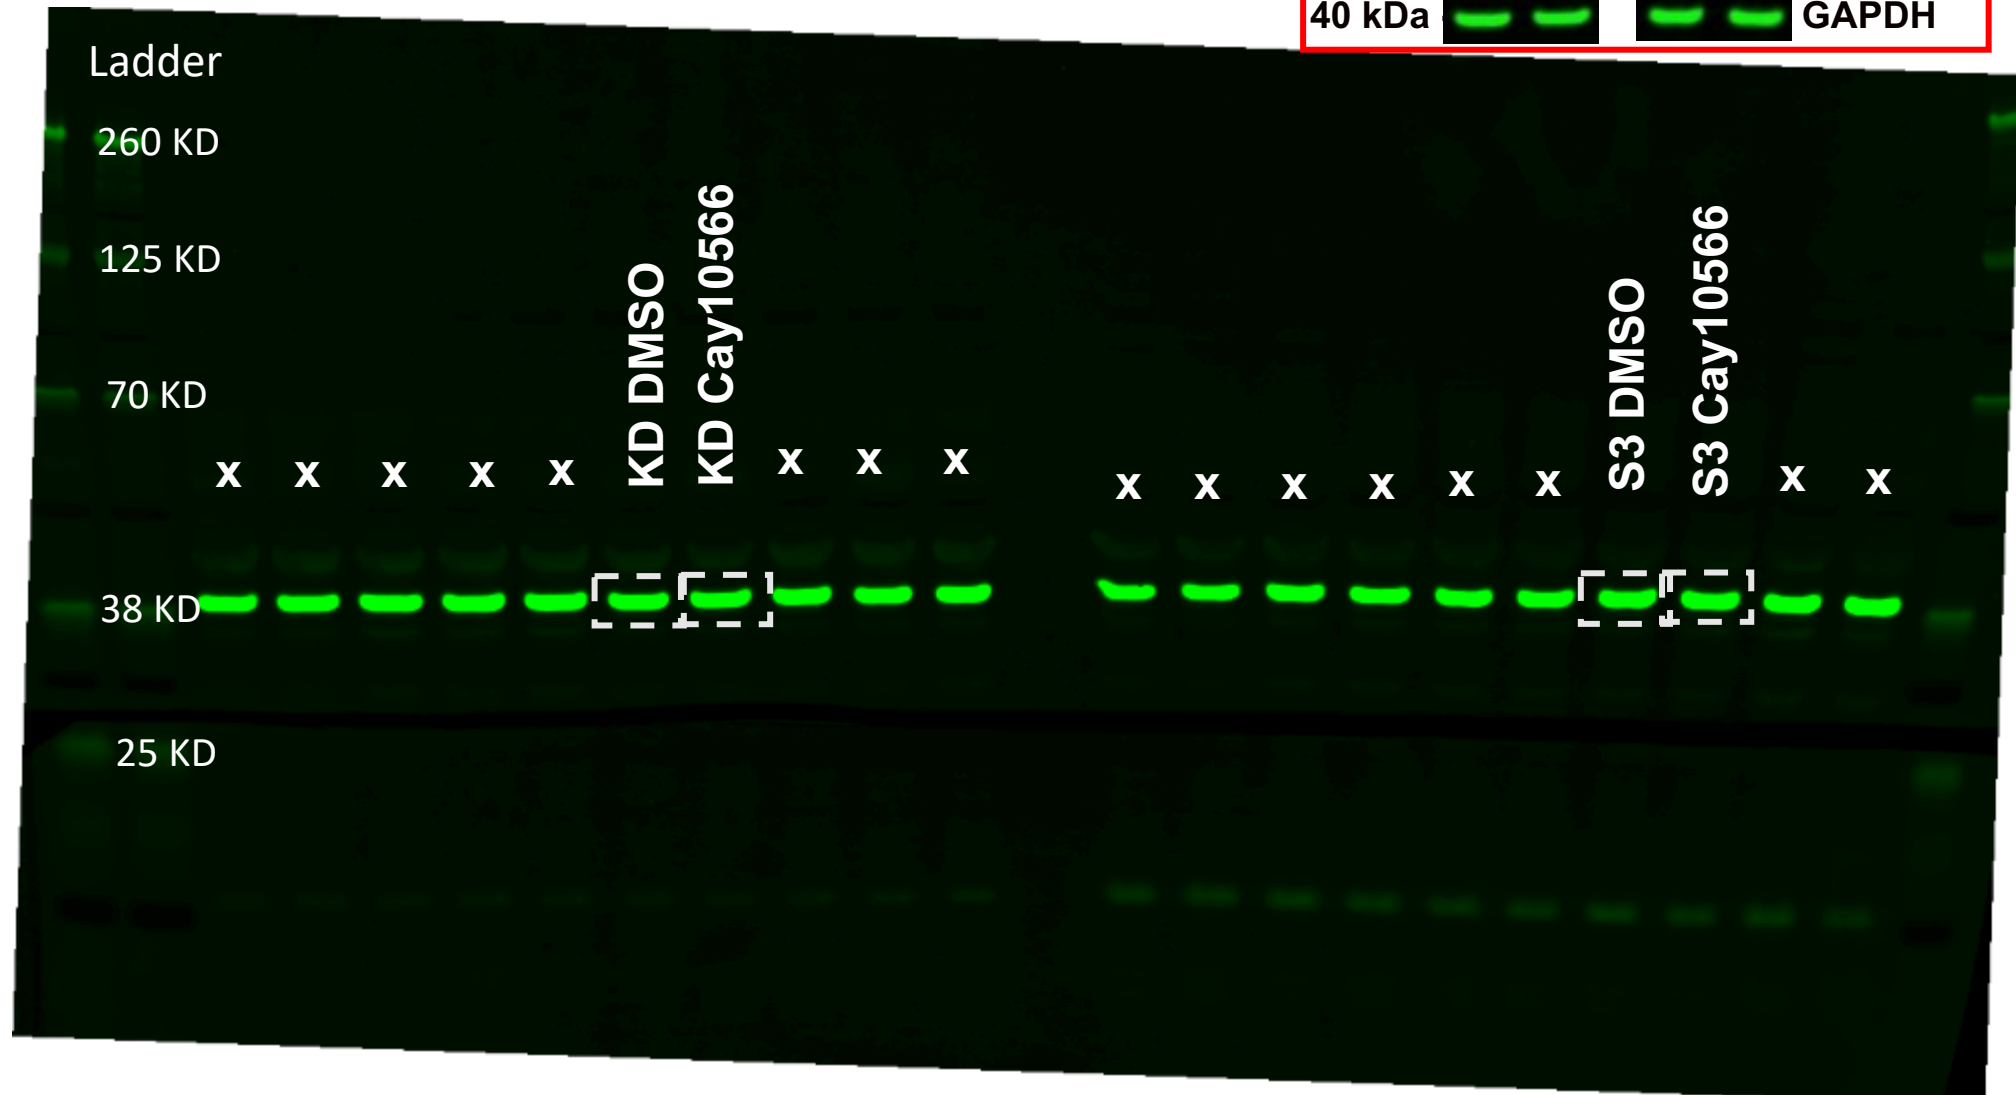

Blot was cut, only top piece is shown

**Figure 5D: pS129 a-Syn Panels**  
 Imaged with LiCor Odyssey Dlx System

S3 DMSO – Disease  
 Neurospheres  
 treated with DMSO  
 control

S3 Cay10566 –  
 Disease  
 Neurospheres  
 treated with  
 Cay10566

KD DMSO –  
 Isogenic Control  
 Neurospheres  
 treated with DMSO  
 control

KD Cay10566 –  
 Isogenic Control  
 Neurospheres  
 treated with  
 Cay10566

Blot was cut, both  
 pieces shown

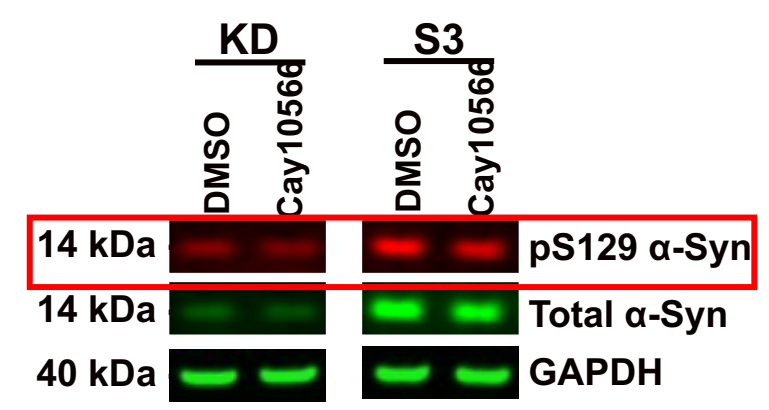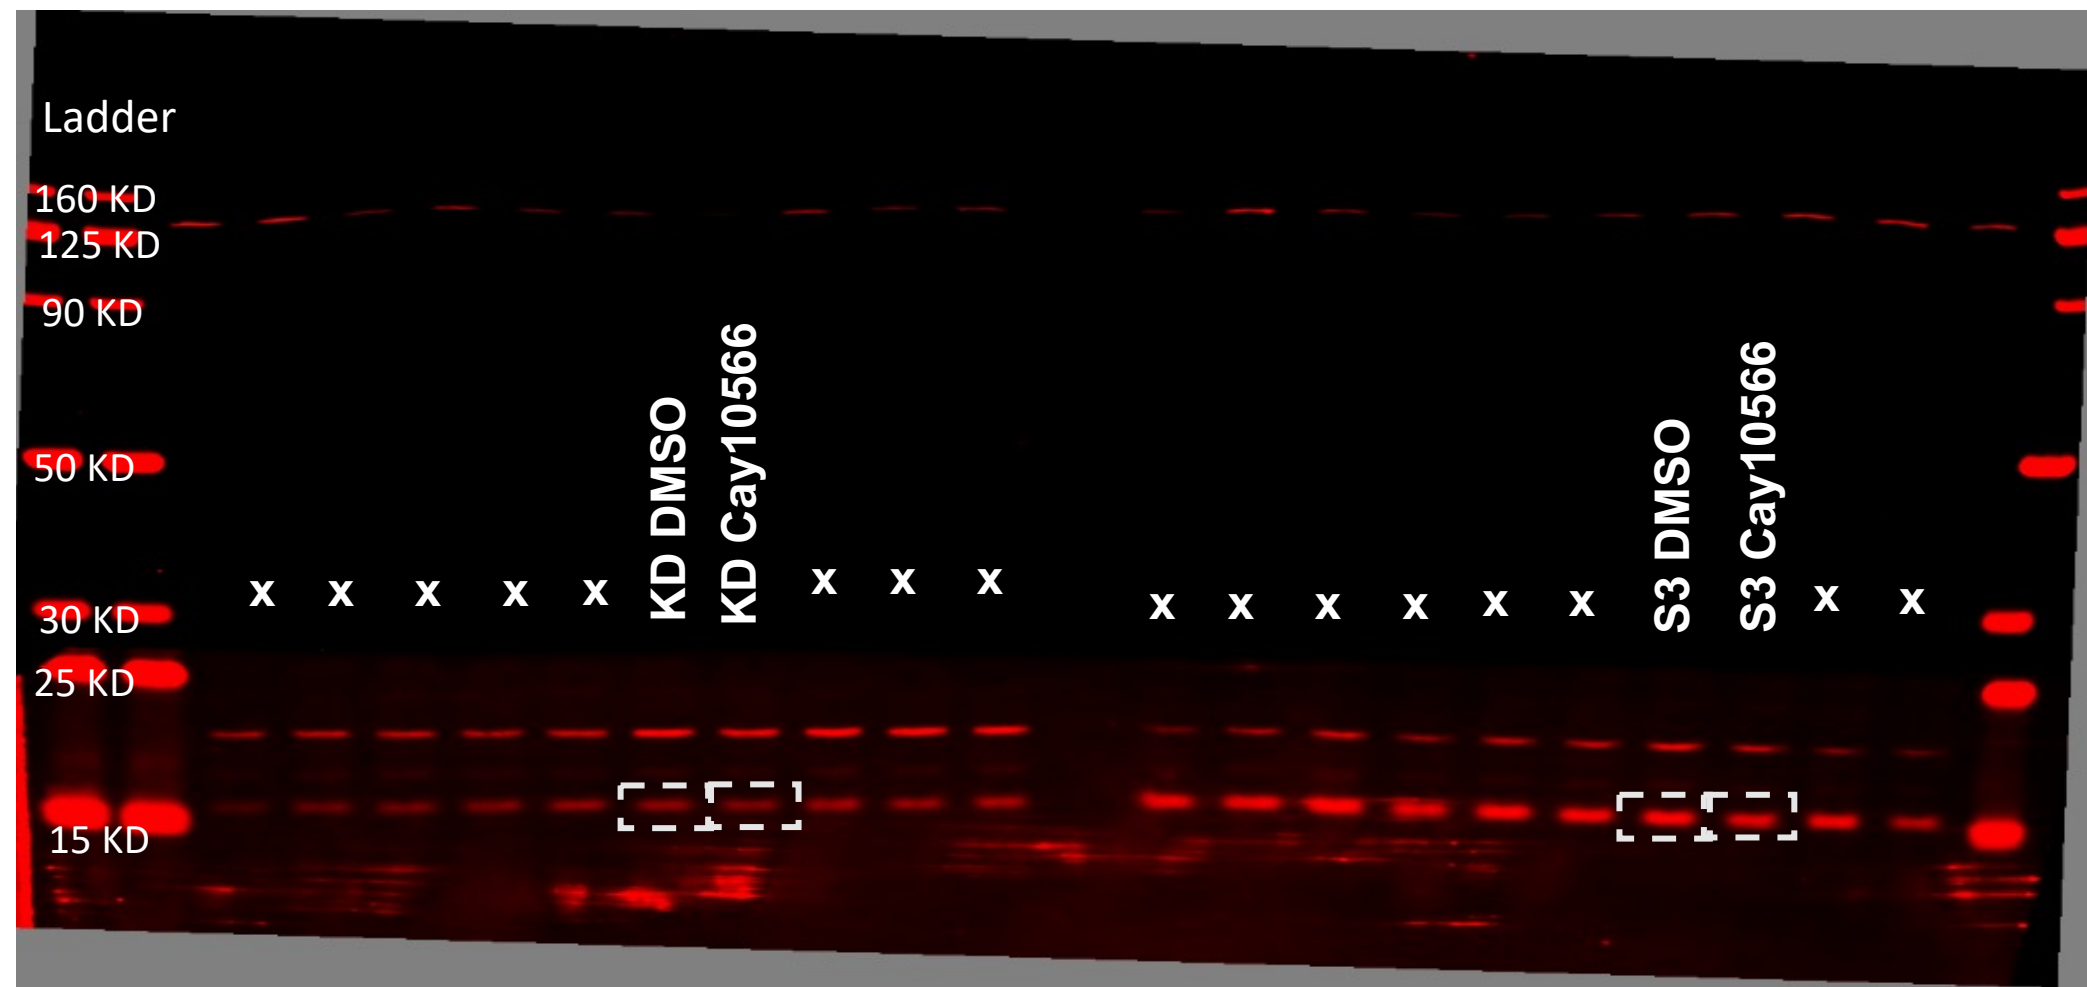

**Figure 5D: Total a-Syn Panels**  
 Imaged with LiCor Odyssey Dlx System

S3 DMSO – Disease  
 Neurospheres  
 treated with DMSO  
 control

S3 Cay10566 –  
 Disease  
 Neurospheres  
 treated with  
 Cay10566  
 KD DMSO –  
 Isogenic Control  
 Neurospheres  
 treated with DMSO  
 control  
 KD Cay10566 –  
 Isogenic Control  
 Neurospheres  
 treated with  
 Cay10566

Blot was cut, both  
 pieces shown

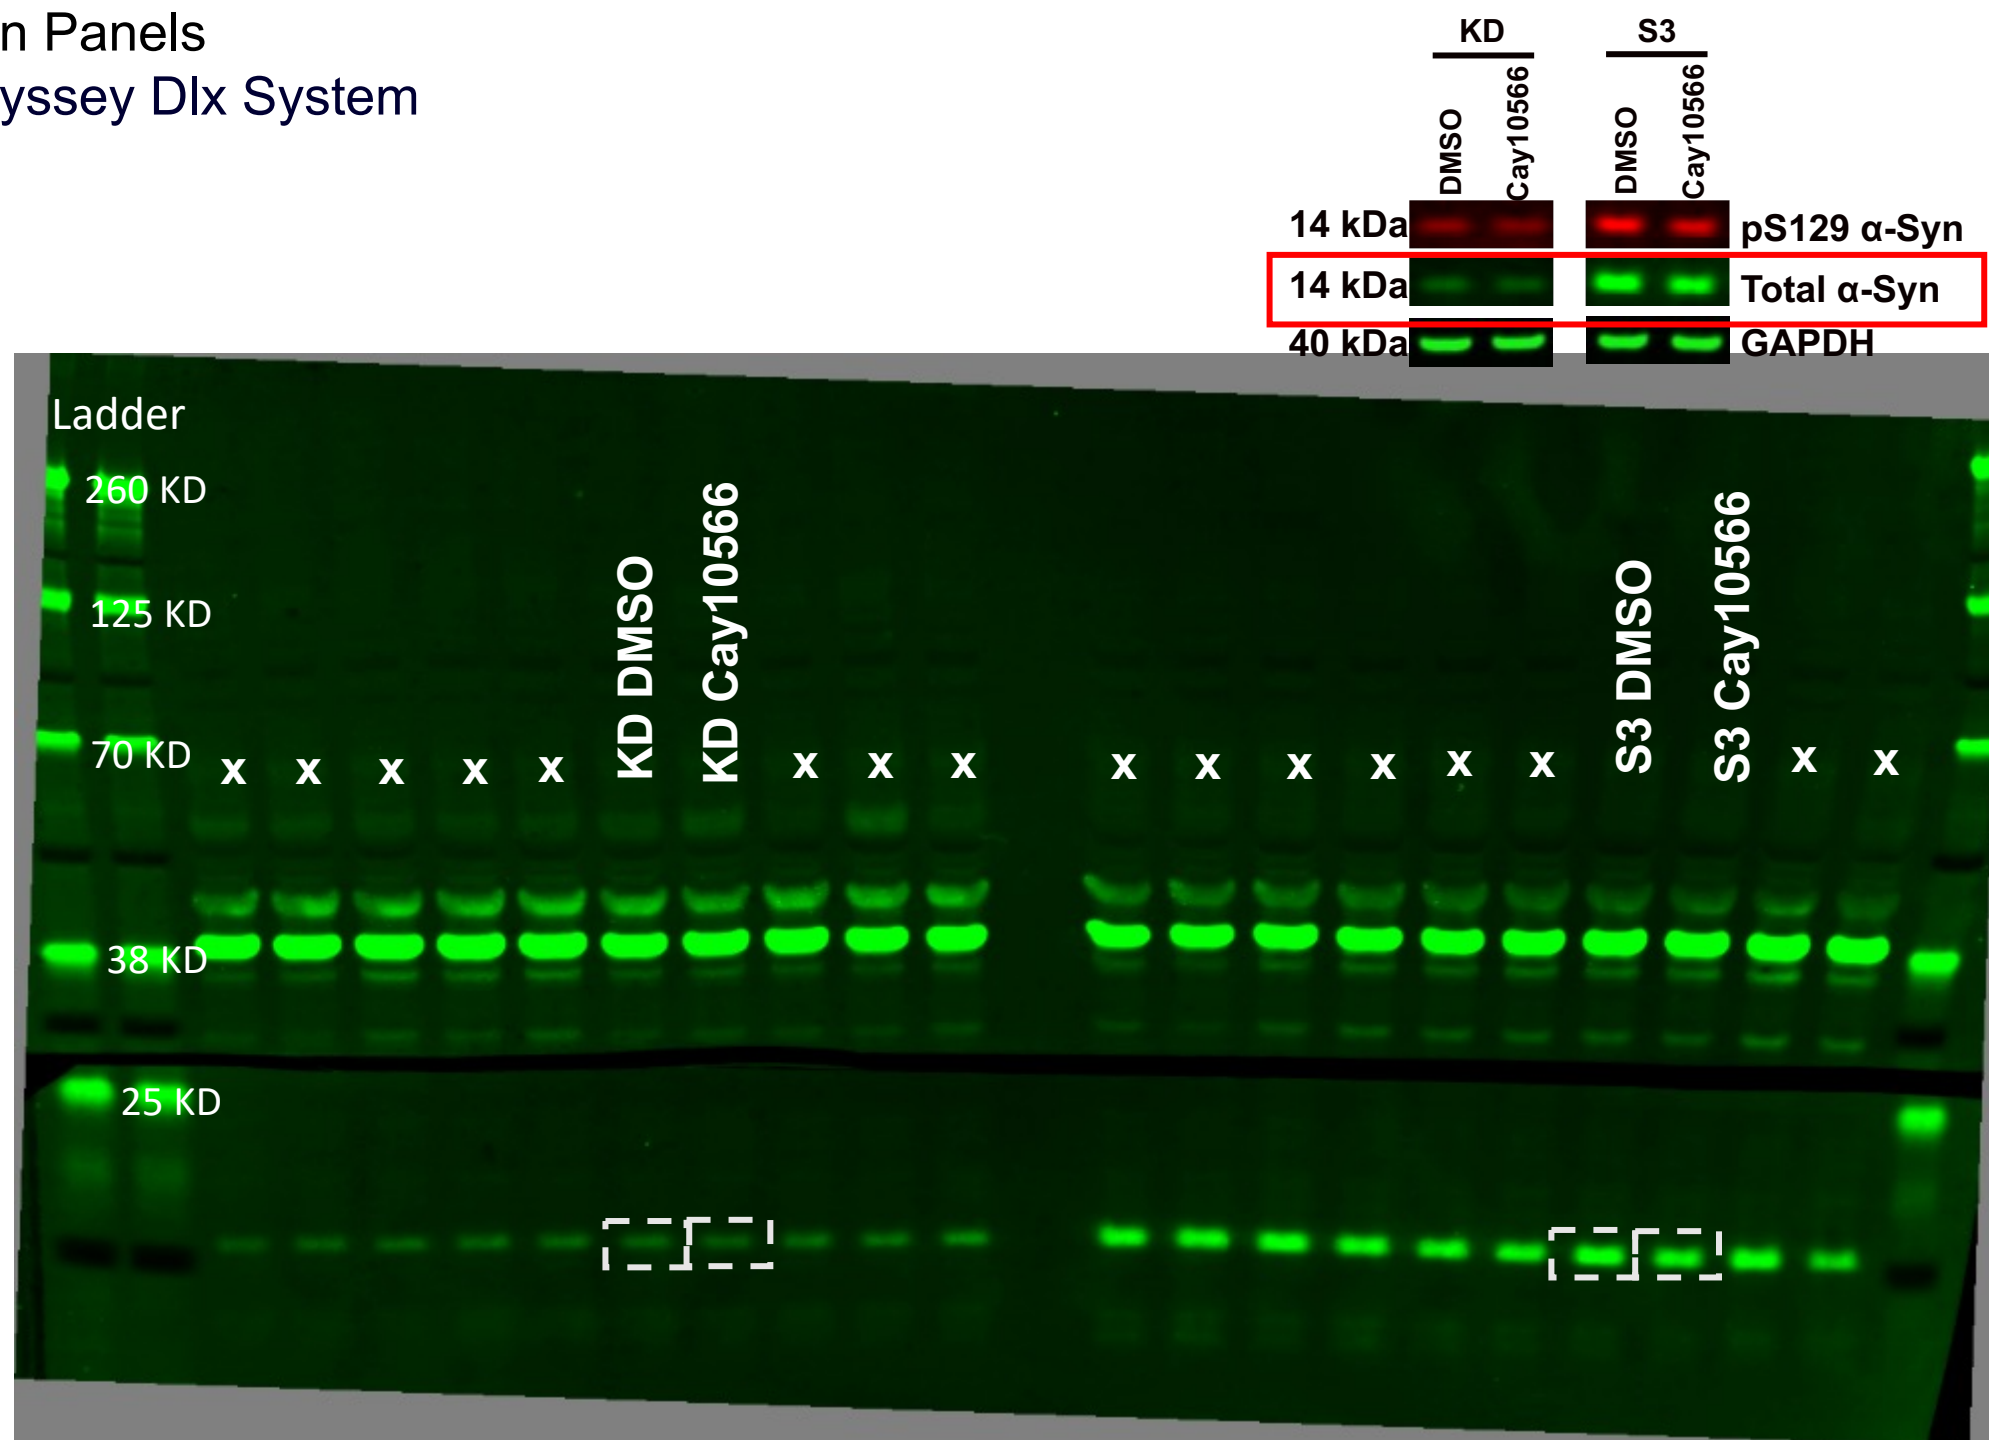



# Supplementary Figure 8: Synapsin-I Panels Imaged with LiCor Odyssey Dlx System

S3 DMSO – Disease Neurospheres treated with DMSO control

S3 Cay10566 – Disease Neurospheres treated with Cay10566

KD DMSO – Isogenic Control Neurospheres treated with DMSO control

KD Cay10566 – Isogenic Control Neurospheres treated with Cay10566

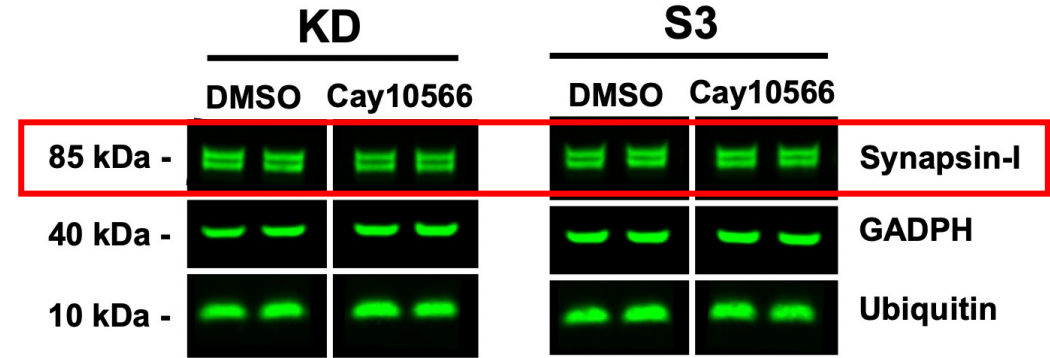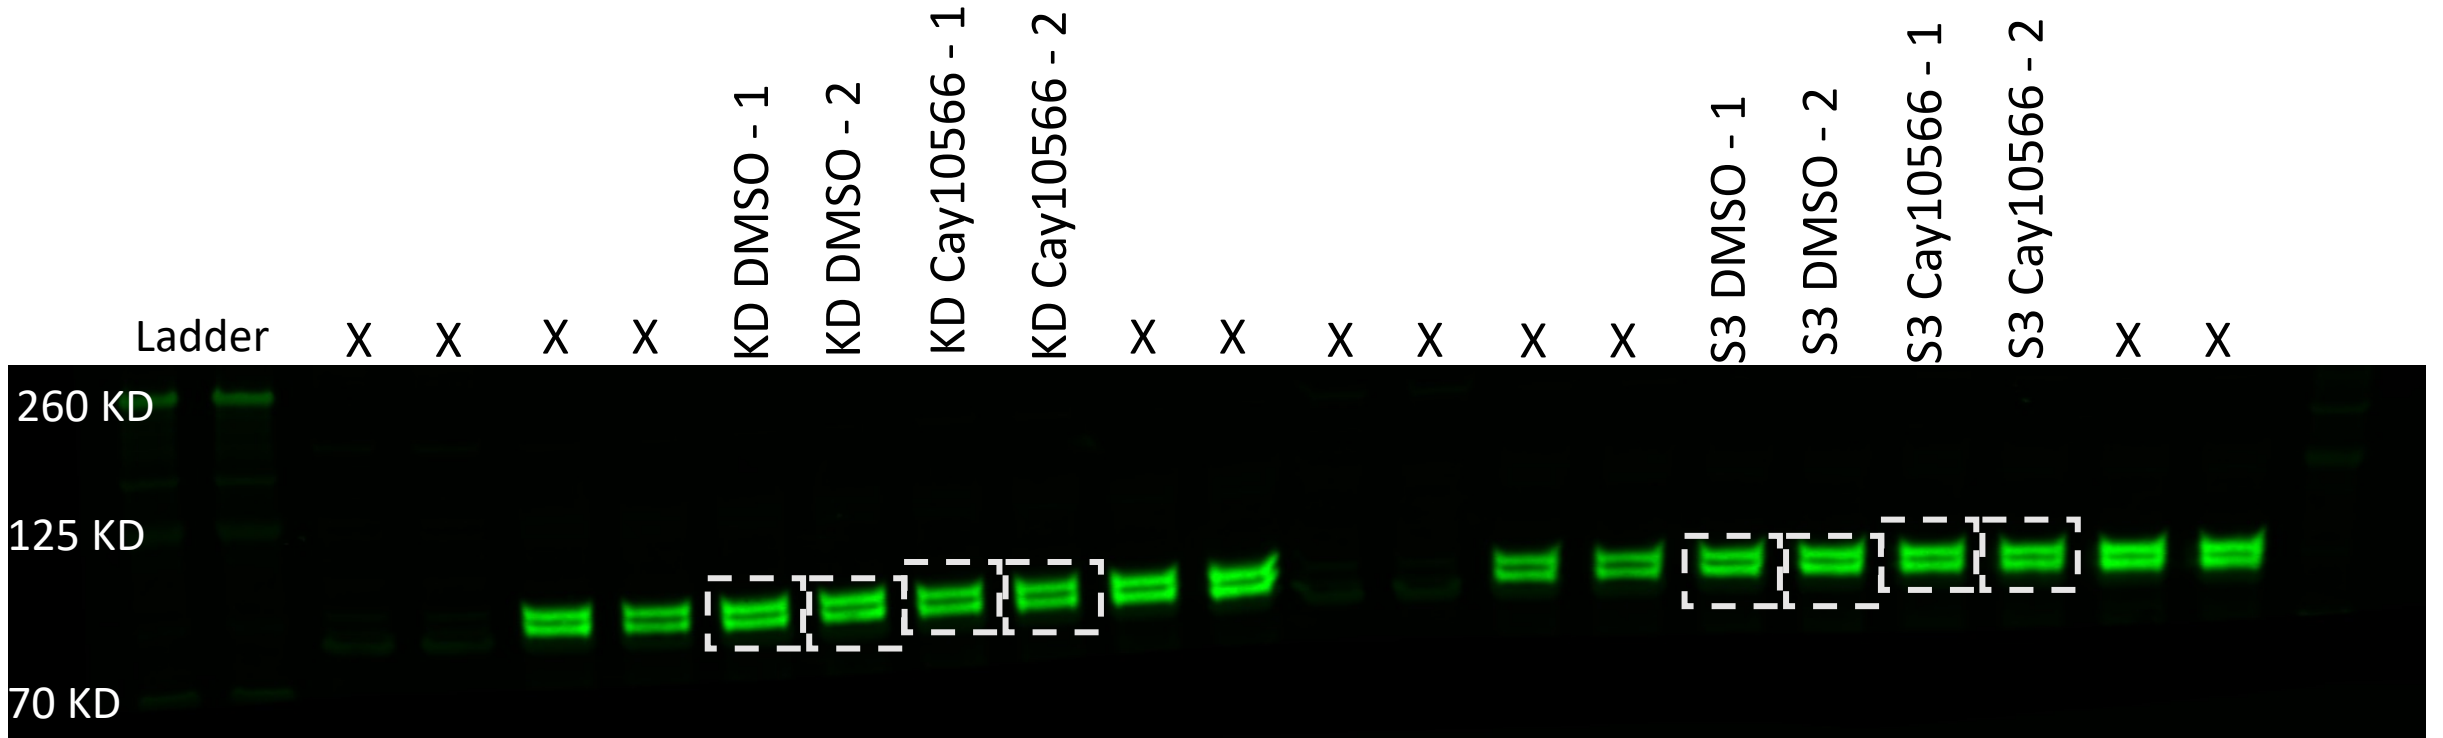

Blot was cut, only top piece shown

# Supplementary Figure 8: GAPDH Panels Imaged with LiCor Odyssey Dlx System

S3 DMSO – Disease  
Neurospheres treated  
with DMSO control

S3 Cay10566 – Disease  
Neurospheres treated  
with Cay10566

KD DMSO – Isogenic  
Control Neurospheres  
treated with DMSO  
control

KD Cay10566 – Isogenic  
Control Neurospheres  
treated with Cay10566

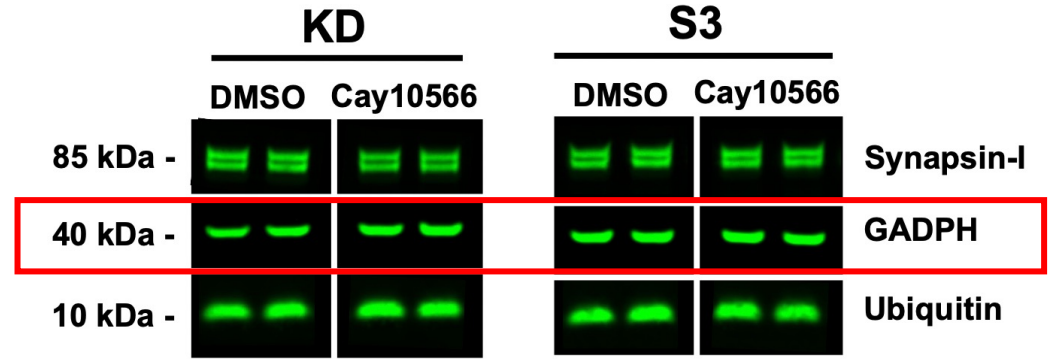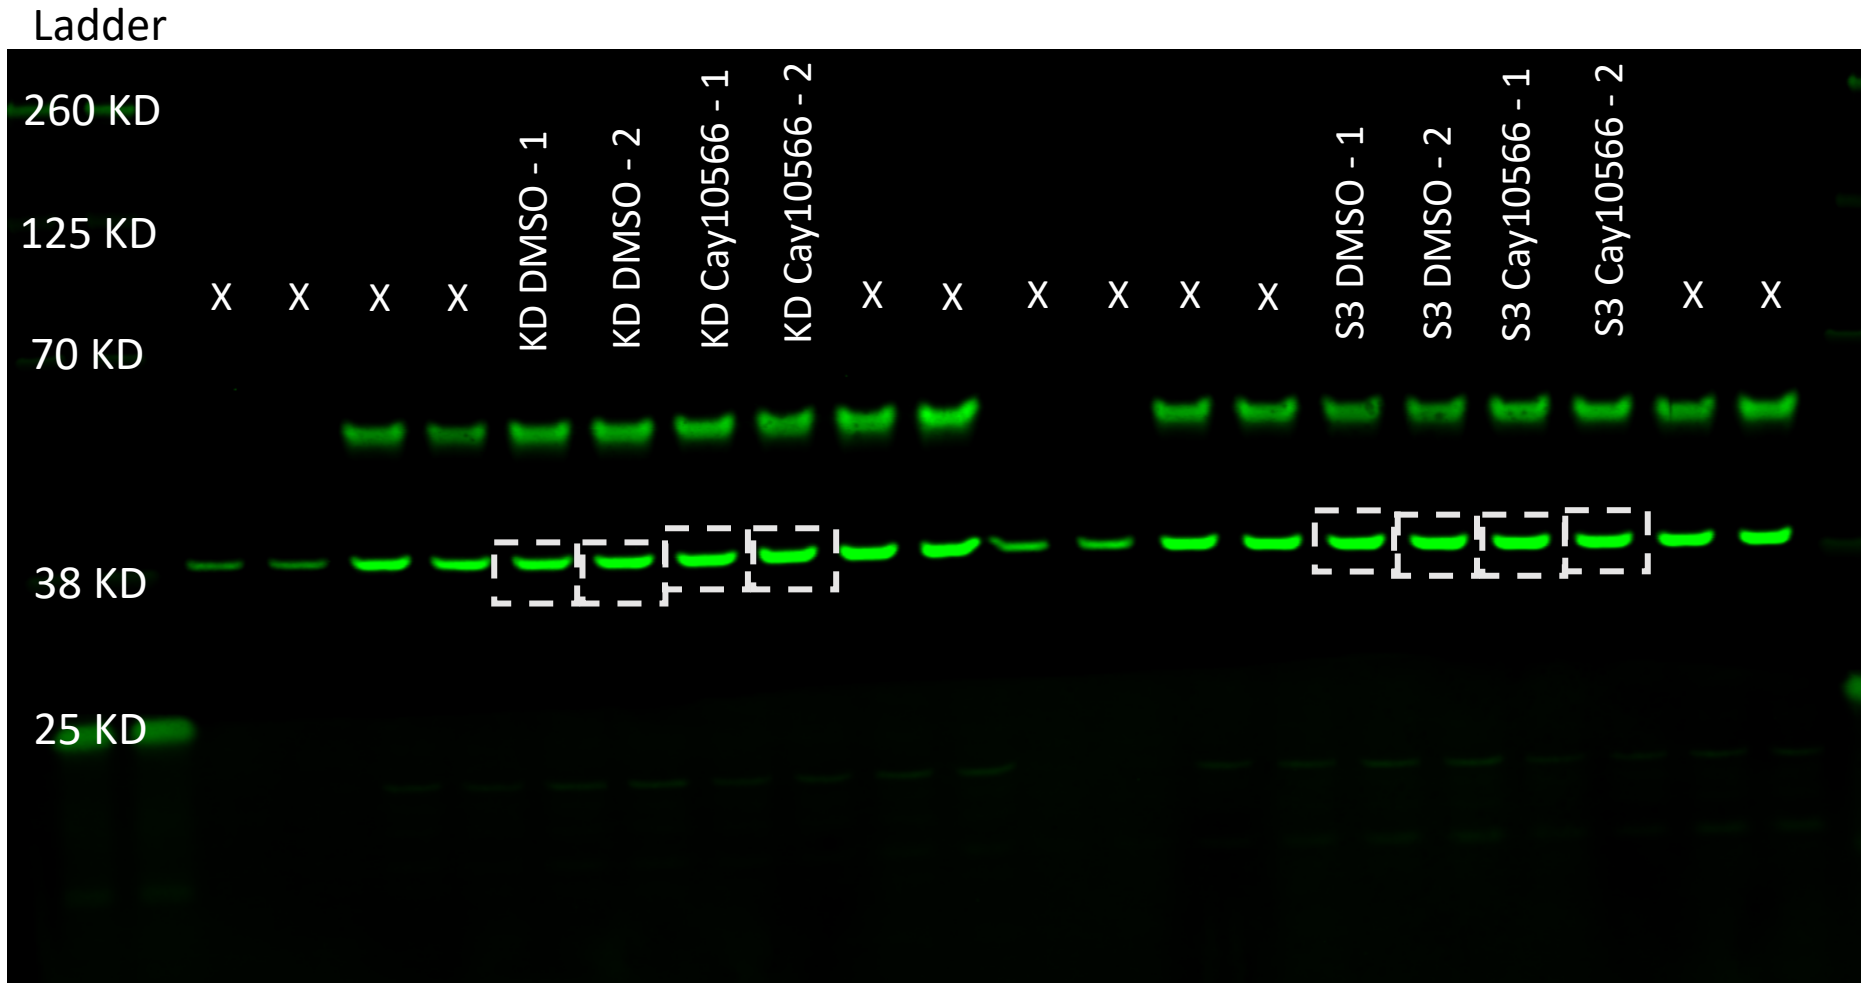

Blot was cut, both  
pieces shown

# Supplementary Figure 8: Ubiquitin Panels Imaged with LiCor Odyssey Dlx System

S3 DMSO – Disease Neurospheres  
treated with DMSO control

S3 Cay10566 – Disease Neurospheres  
treated with Cay10566

KD DMSO – Isogenic Control

Neurospheres treated with DMSO control

KD Cay10566 – Isogenic Control

Neurospheres treated with Cay10566

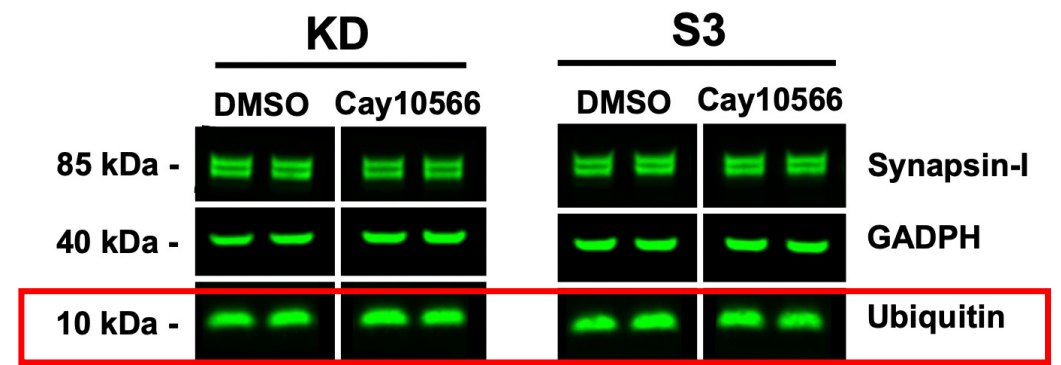

| Ladder | X | X | X | X | KD DMSO - 1 | KD DMSO - 2 | KD Cay10566 - 1 | KD Cay10566 - 2 | X | X | X | X | X | X | S3 DMSO - 1 | S3 DMSO - 2 | S3 Cay10566 - 1 | S3 Cay10566 - 2 | X | X |
|--------|---|---|---|---|-------------|-------------|-----------------|-----------------|---|---|---|---|---|---|-------------|-------------|-----------------|-----------------|---|---|
|--------|---|---|---|---|-------------|-------------|-----------------|-----------------|---|---|---|---|---|---|-------------|-------------|-----------------|-----------------|---|---|

25 KD

Blot  
was cut,  
only  
bottom  
piece  
shown

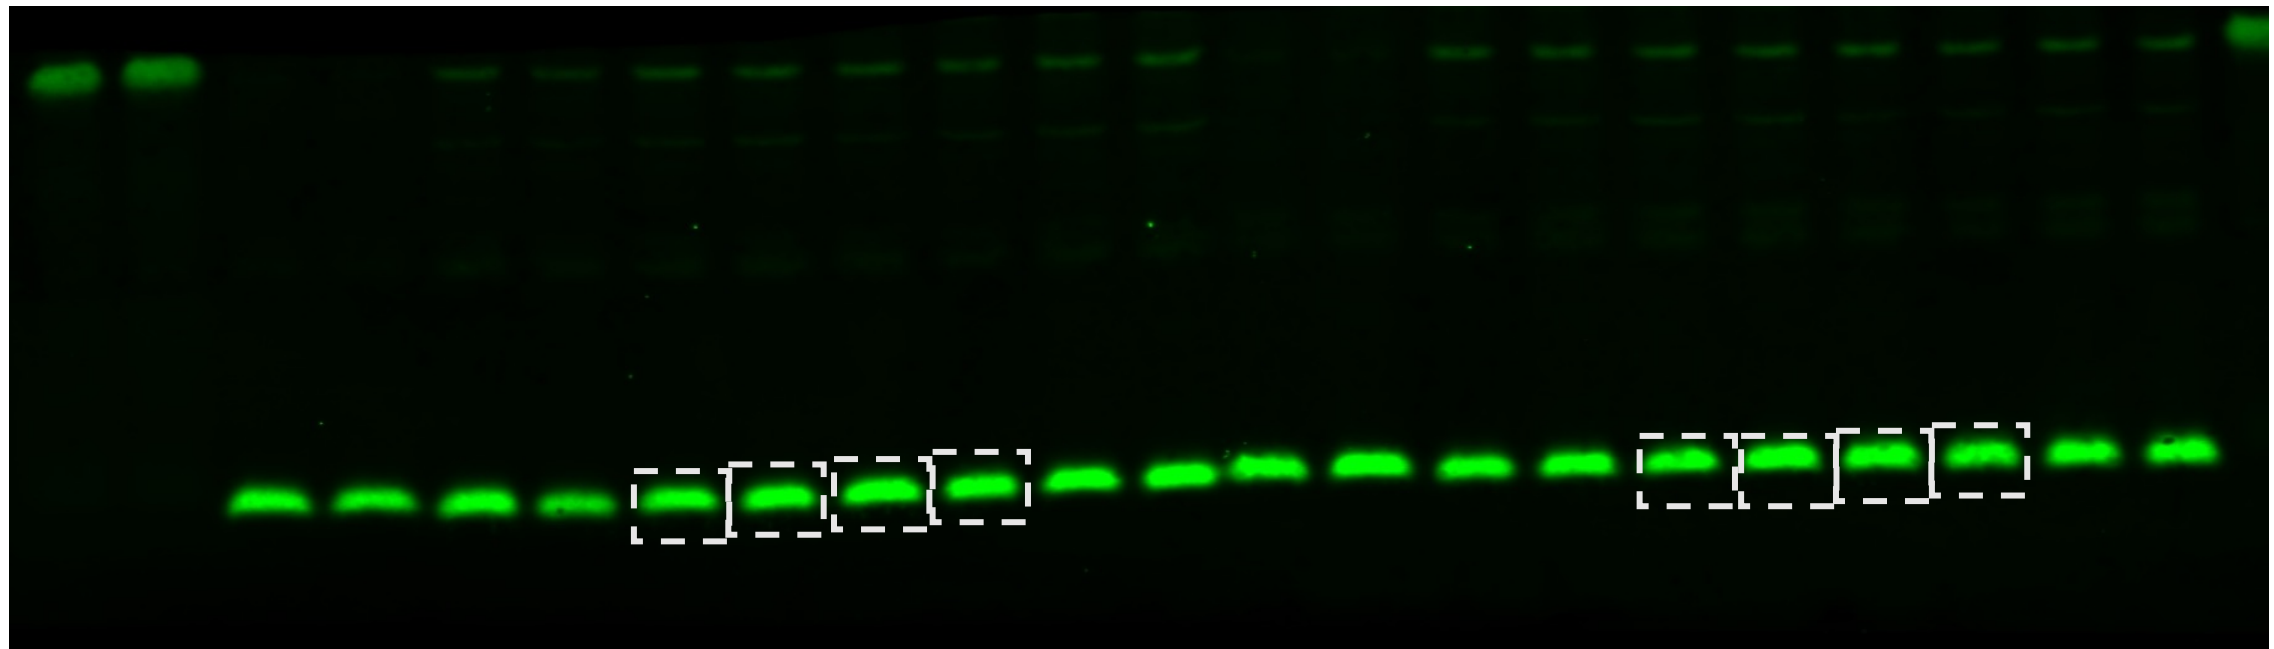

Supplement: pone.0277532.s002.pdf [file pone.0277532.s002.pdf]
